# Supplementary material for: Metformin use and long-term risk of benign prostatic hyperplasia: a population-based cohort study
Source: PubMed Central journal article supplement — BMJ Open. 2020 Dec 22;10(12):e041875. doi: 10.1136/bmjopen-2020-041875 (PMC7757457; doi:10.1136/bmjopen-2020-041875), 2020-12-22
Supplement: bmjopen-2020-041875.draft_revisions.pdf [file bmjopen-2020-041875.draft_revisions.pdf]

# BMJ Open

BMJ Open is committed to open peer review. As part of this commitment we make the peer review history of every article we publish publicly available.

When an article is published we post the peer reviewers' comments and the authors' responses online. We also post the versions of the paper that were used during peer review. These are the versions that the peer review comments apply to.

The versions of the paper that follow are the versions that were submitted during the peer review process. They are not the versions of record or the final published versions. They should not be cited or distributed as the published version of this manuscript.

BMJ Open is an open access journal and the full, final, typeset and author-corrected version of record of the manuscript is available on our site with no access controls, subscription charges or pay-per-view fees (<http://bmjopen.bmj.com>).

If you have any questions on BMJ Open's open peer review process please email [info.bmjopen@bmj.com](mailto:info.bmjopen@bmj.com)

# BMJ Open

## Metformin use and long-term risk of benign prostatic hyperplasia. A population-based cohort study.

|                               |                                                                                                                                                                                                                                                            |
|-------------------------------|------------------------------------------------------------------------------------------------------------------------------------------------------------------------------------------------------------------------------------------------------------|
| Journal:                      | <i>BMJ Open</i>                                                                                                                                                                                                                                            |
| Manuscript ID                 | bmjopen-2020-041875                                                                                                                                                                                                                                        |
| Article Type:                 | Original research                                                                                                                                                                                                                                          |
| Date Submitted by the Author: | 19-Jun-2020                                                                                                                                                                                                                                                |
| Complete List of Authors:     | Nørgaard, Mette; Aarhus University Hospital, Department of Clinical Epidemiology<br>Darvalics, Bianka; Aarhus University Hospital, Department of Clinical Epidemiology<br>Thomsen, Reimar; Aarhus University Hospital, Department of Clinical Epidemiology |
| Keywords:                     | DIABETES & ENDOCRINOLOGY, Adult urology < UROLOGY, EPIDEMIOLOGY                                                                                                                                                                                            |
|                               |                                                                                                                                                                                                                                                            |

SCHOLARONE™  
Manuscripts

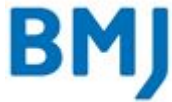

I, the Submitting Author has the right to grant and does grant on behalf of all authors of the Work (as defined in the below author licence), an exclusive licence and/or a non-exclusive licence for contributions from authors who are: i) UK Crown employees; ii) where BMJ has agreed a CC-BY licence shall apply, and/or iii) in accordance with the terms applicable for US Federal Government officers or employees acting as part of their official duties; on a worldwide, perpetual, irrevocable, royalty-free basis to BMJ Publishing Group Ltd ("BMJ") its licensees and where the relevant Journal is co-owned by BMJ to the co-owners of the Journal, to publish the Work in this journal and any other BMJ products and to exploit all rights, as set out in our [licence](#).

The Submitting Author accepts and understands that any supply made under these terms is made by BMJ to the Submitting Author unless you are acting as an employee on behalf of your employer or a postgraduate student of an affiliated institution which is paying any applicable article publishing charge ("APC") for Open Access articles. Where the Submitting Author wishes to make the Work available on an Open Access basis (and intends to pay the relevant APC), the terms of reuse of such Open Access shall be governed by a Creative Commons licence – details of these licences and which [Creative Commons](#) licence will apply to this Work are set out in our licence referred to above.

Other than as permitted in any relevant BMJ Author's Self Archiving Policies, I confirm this Work has not been accepted for publication elsewhere, is not being considered for publication elsewhere and does not duplicate material already published. I confirm all authors consent to publication of this Work and authorise the granting of this licence.

1  
2  
3  
4 Metformin use and long-term risk of benign prostatic hyperplasia. A population-based cohort study.  
5  
6  
7  
8  
9  
10  
11  
12

13 Mette Nørgaard PhD<sup>1</sup>, Bianka Darvalics MSc<sup>1</sup>, Reimar W Thomsen PhD<sup>1</sup>  
14  
15

16 <sup>1</sup>Department of Clinical Epidemiology, Institute of Clinical Medicine, Aarhus University Hospital,  
17  
18 Aarhus, Denmark  
19  
20  
21  
22  
23  
24

25 **Corresponding Author:**  
26  
27

28 Mette Nørgaard, Department of Clinical Epidemiology, Aarhus University Hospital, Olof Palmes  
29  
30 Allé 43-45, 8200 Aarhus N, Denmark. Telephone: +45 87168205; Fax: +45 87167215; E-mail:  
31  
32 mn@clin.au.dk  
33  
34  
35  
36  
37  
38

39 Word count: Text: 3153  
40  
41

42 Abstract: 271  
43  
44

45 Number of figures/tables: 3 tables (embedded in the text) and 1 figure  
46  
47

48 **Keywords:** benign prostatic hyperplasia, metformin, population-based cohort study, sulfonylurea,  
49  
50 type 2 diabetes  
51  
52  
53  
54  
55  
56  
57  
58  
59  
60

1  
2  
3  
4  
5  
6  
7  
8  
9  
10  
11  
12  
13  
14  
15  
16  
17  
18  
19  
20  
21  
22  
23  
24  
25  
26  
27  
28  
29  
30  
31  
32  
33  
34  
35  
36  
37  
38  
39  
40  
41  
42  
43  
44  
45  
46  
47  
48  
49  
50  
51  
52  
53  
54  
55  
56  
57  
58  
59  
60

## Abstract

**Objective:** To assess whether metformin use affects risk of benign prostatic hyperplasia (BPH) by comparing the risk of BPH in men with type 2 diabetes who initiated first-line treatment with either metformin or sulfonylurea monotherapy between 2000 or 2006 in Northern Denmark. In this period, sulfonylurea or metformin were both frequently used as first line glucose-lowering drug treatment.

**Design:** A population-based cohort study

**Setting:** Northern Denmark

**Participants:** All men who filled at least 2 prescriptions for metformin or for sulfonylurea, respectively during their first 6 months of glucose-lowering drug treatment. Follow-up started 6 months after treatment start.

**Primary outcome measures:** Rates of subsequent BPH, identified based on community prescriptions for BPH-related treatment or hospital BPH diagnoses, and rates of transurethral resection of the prostate (TURP). Rates in metformin and sulfonylurea users were compared overall and stratified by 6-month hemoglobin A<sub>1c</sub> (HbA<sub>1c</sub>) using Cox regression and an intention to treat (ITT) approach and an as treated analysis.

**Results** In 3,953 metformin initiators with a median follow-up of 10 years, the 10-year cumulative incidence was 25.7 % (95% CI 24.2 to 27.1). Compared with 5,958 sulfonylurea users (median follow-up 8 years, 10-year cumulative incidence 27.4% (95% CI 26.2 to 28.6)), the crude hazard ratio (HR) for BPH was 0.83 (95% CI 0.77 to 0.89) and adjusted HR in the ITT analyses was 0.97 (95% CI 0.88 to 1.06). For TURP the adjusted HR was 0.96 (95% CI 0.63 to 1.46). In the as-treated analysis, adjusted HR for BPH was 0.91 (95% CI 0.81 to 1.02).

1  
2  
3  
4 **Conclusions** Compared with sulfonylurea, metformin did not substantially reduce the incidence of  
5  
6 BPH in men with diabetes.  
7  
8  
9  
10  
11  
12  
13  
14  
15  
16  
17  
18  
19  
20  
21  
22  
23  
24  
25  
26  
27  
28  
29  
30  
31  
32  
33  
34  
35  
36  
37  
38  
39  
40  
41  
42  
43  
44  
45  
46  
47  
48  
49  
50  
51  
52  
53  
54  
55  
56  
57  
58  
59  
60

For peer review only

1  
2  
3  
4  
5  
6  
7  
8  
9  
10  
11  
12  
13  
14  
15  
16  
17  
18  
19  
20  
21  
22  
23  
24  
25  
26  
27  
28  
29  
30  
31  
32  
33  
34  
35  
36  
37  
38  
39  
40  
41  
42  
43  
44  
45  
46  
47  
48  
49  
50  
51  
52  
53  
54  
55  
56  
57  
58  
59  
60

### Strengths and limitations of this study

- The study used population-based data from two well-defined Danish regions.
- Use of nationwide medical registries allowed long and virtually complete follow-up
- Initiators of glucose-lowering drugs could be identified in a calendar period in which both metformin and sulfonylurea were recommended and used as first-line treatment which minimized confounding by indication.
- Benign prostatic hyperplasia was defined both based on hospital-related diagnoses and by prescriptions for relevant medication.
- We categorized treatment based on the choice of glucose-lowering drug during the first 6 months after treatment start applying an intention to treat principle but we also included an as treated analysis.

## Introduction

Benign prostatic hyperplasia (BPH) associated with lower urinary tract symptoms is a common condition estimated to affect around 20% of American men aged 30-79 years<sup>1</sup>. Risk factors associated with dysmetabolism and low-grade inflammation, including obesity, high blood glucose, low exercise, and poor diet, seem to contribute substantially to the development of BPH and lower urinary tract symptoms<sup>2-3</sup>. Moreover, prostatic inflammation is likely a key factor in the development of BPH and also prostate cancer<sup>4</sup>. Accordingly, it has been hypothesized that insulin resistance and increased fasting plasma insulin are promoters of both BPH and prostate cancer<sup>5</sup>.

Among men with type 2 diabetes, some observational studies have suggested that use of metformin reduces the risk of prostate cancer, compared with use of other glucose lowering drugs (GLD)<sup>6-8</sup> while others found no clear association<sup>9-11</sup>. A recent study found that metformin inhibits the proliferation of human prostate epithelial cells<sup>12</sup>, and thus may reduce the BPH development as well as development of prostate cancer. Yet, few studies have examined the association between use of metformin and risk of BPH in diabetic men. A cohort study including 192,457 male veterans with type 2 diabetes and 259,995 person-years of follow up found no association between use of thiazolidinediones or metformin and new medical or surgical treatment for BPH, when compared with use of sulfonylurea<sup>13</sup>. While, a recent cohort study from South Korea found among 211,648 men with newly diagnosed BPH that men with type 2 diabetes in metformin treatment had lower risk of progression to prostatectomy than both men without type 2 diabetes and men with type 2 diabetes with no metformin treatment<sup>14</sup>.

Comparing the effects of different GLDs in observational studies is complicated by the fact that the underlying indications/contraindications may differ between the drugs<sup>15</sup>. Compared with sulfonylurea, metformin has a more favorable effect on body weight and insulin resistance and



1  
2  
3  
4 patients receiving metformin are therefore likely to have a higher prevalence of obesity and a higher  
5  
6 plasma insulin level than users of sulfonylurea <sup>16</sup>. At least since 2011, metformin has been  
7  
8 unequivocally consensus recommended as first-choice treatment in type 2 diabetes in Denmark,  
9  
10 based on evidence from the UK Prospective Diabetes Study 1998 <sup>17</sup> and its 10-year follow up in  
11  
12 2008 <sup>18</sup>. Already in the mid-2000s however, the European Association for the Study of Diabetes and  
13  
14 the American Diabetes Association recommended use of metformin as first-line drug <sup>19 20</sup>.  
15  
16 Previously - in particular during the first half of the 2000s - metformin and sulfonylurea were both  
17  
18 widely recommended and used as first-line treatment for type 2 diabetes in Denmark <sup>21</sup>. We  
19  
20 therefore conducted a large population-based cohort study to examine the long-term risk of BPH in  
21  
22 men with type 2 diabetes who initiated pharmacotherapy with either metformin or sulfonylurea  
23  
24 between 2000 and 2006 in Northern Denmark. Our hypothesis was that use of metformin was  
25  
26 associated with a lower BPH rate than use of sulfonylurea in men with type 2 diabetes.  
27  
28  
29  
30  
31  
32  
33

## 34 **Methods**

### 35 *Setting*

36  
37 We conducted a population-based cohort study among men with type 2 diabetes living in Northern  
38  
39 Denmark using Danish medical databases. Northern Denmark consists of two regions, the Central  
40  
41 Denmark region and the North Denmark region with approximately 700,000 male inhabitants. All  
42  
43 residents are provided free tax-supported access to health care. All Danish residents are, at birth or  
44  
45 upon immigration, assigned a unique personal identifier, the CPR number, by the Danish Civil  
46  
47 Registration system (CRS)<sup>22</sup>. This identifier allows unambiguous linkage of data at the individual  
48  
49 level. The CRS additionally tracks changes in vital status, residence, and migration for the entire  
50  
51 Danish population on a daily basis. The Danish National Patient Registry (DNPR) has recorded all  
52  
53 admissions to all Danish hospitals since 1977 <sup>23</sup>. Hospital outpatient and emergency room visits  
54  
55  
56  
57  
58  
59  
60

1  
2  
3  
4 have been included in the DNPR since 1995. Diagnoses are classified according to the *International*  
5  
6 *Classification of Diseases, Eighth Revision (ICD-8)* until the end of 1993 and *Tenth Revision (ICD-*  
7  
8 *10)* thereafter.

#### 14 *Assembly of the cohort*

16 We included all men 30 years or older with incident type 2 diabetes, who received their first GLD  
17  
18 treatment between 1 January 2000 and 31 December 2006, corresponding to the time period when  
19  
20 the Danish guidelines recommended both metformin and sulfonylurea as first line treatment for type  
21  
22 2 diabetes<sup>21</sup>. We defined incident type 2 diabetes as either a first record in the Danish National  
23  
24 Patient Registry (DNPR) of a diabetes-associated inpatient admission (data available from 1977) or  
25  
26 outpatient clinic contact (data available from 1995) or the first record of a GLD prescription in the  
27  
28 Aarhus University Prescription Database (data available from 1996)<sup>24</sup>. Thus, patients with a GLD  
29  
30 prescription in the 1996-1999 period were excluded.

#### 36 *GLD treatment*

38 We categorized patients according to their first GLD treatment, metformin or sulfonylurea. To  
39  
40 avoid including patients who switched or augmented GLD treatment very early (potentially due to  
41  
42 adverse reactions or insufficient early glucose control) we required the patients to receive either  
43  
44 metformin or sulfonylurea monotherapy for at least six months by requiring two prescriptions for  
45  
46 the same type of GLD within 6 months after treatment start. Accordingly, we did not include  
47  
48 patients who started combination therapy or who switched type of treatment away from metformin  
49  
50 or sulfonylurea monotherapy, respectively during the first 6 months of treatment. First, we used an  
51  
52 intention to treat principle and ignored treatment after the first 6 months when categorizing the  
53  
54 patients according to treatment exposure. Next, we categorized patients “as treated” so that patients  
55  
56  
57  
58  
59  
60

1  
2  
3  
4 were considered exposed with a specific GLD from first prescription of this GLD until the end of  
5  
6 the last prescription of this type of GLD (based on the estimated number of days covered by the  
7  
8 pack size of a filled prescription) + a washout period.  
9

### 10 11 12 *Outcome*

13  
14  
15 Our primary outcome was first-time BPH defined as the first of a first-time hospital-related  
16  
17 discharge diagnosis (See supplementary data for codes) recorded in DNPR or a first time filled  
18  
19 community pharmacy prescription for BPH-treatment (alpha-blockers or 5-alpha reductase  
20  
21 inhibitors).  
22  
23

24  
25 As a secondary outcome, we included information on transurethral resection of the prostate  
26  
27 (TURP). Additionally, we examined hospital-related BPH diagnoses separately. Finally, we  
28  
29 identified all hospital contacts with a first time diagnosis code of urinary retention since this may be  
30  
31 a first acute manifestation of BPH but can also be caused by neuropathic bladder disease<sup>25</sup> and we  
32  
33 analyzed BPH and acute urinary retention as a composite outcome. We excluded men with any of  
34  
35 these outcomes before start of follow-up.  
36  
37  
38

### 39 40 *Diabetes severity*

41  
42  
43 We assessed diabetes severity at the time of follow-up start 6 months after first GLD treatment,  
44  
45 using diabetes duration (see below), the presence of microvascular and macrovascular diabetes  
46  
47 complications (see supplementary data for codes), and glycemic control, i.e. the latest hemoglobin  
48  
49 A1c (HbA<sub>1c</sub>) measured in the year prior to start of follow-up. HbA<sub>1c</sub> -levels were registered in the  
50  
51 clinical laboratory information system database (LABKA) which contains results of all analyses of  
52  
53 blood samples drawn from primary care and hospitalized patients and analyzed in hospital  
54  
55 laboratories in the Northern and Central Denmark regions<sup>26</sup>. We categorized HbA<sub>1c</sub> into three  
56  
57 levels (<7% [53 mmol/mol], 7-<8% [53-<64 mmol/mol], ≥8% [64 mmol/mol]), and categorized  
58  
59  
60

1  
2  
3  
4 those with missing variables separately.  
5  
6  
7  
8

9  
10 *Other covariates*

11  
12 We obtained information on age from the Civil Registration System (CRS). From the DNPR we  
13 included the 19 major comorbidities included in the Charlson comorbidity index (CCI), based on  
14 each cohort member's entire hospital contact history prior to his index date and calculated the  
15 patients CCI score (0, 1, 2+). We also included information on previous ischemic heart disease  
16 (yes/no), cerebrovascular disease (yes/no), chronic obstructive pulmonary disease (COPD) (yes/no),  
17 renal disease (yes/no) along with other covariates potentially associated with BPH or prostatic  
18 inflammation: microvascular and macrovascular diabetes complications not included in the CCI;  
19 diabetes duration (if a hospital diagnosis of diabetes was present before the GLD initiation/index  
20 date); a hospital diagnosis of obesity (yes/no); alcoholism-related disorders (yes/no); use of  
21 immunosuppressive drugs (yes/no), use of oral corticosteroids (yes/no), and use of statins (yes/no);  
22 marital status as a marker of social support (married/never married/divorced/widowed); and  
23 calendar period of GLD initiation (2000–2002/2003–2006).  
24  
25  
26  
27  
28  
29  
30  
31  
32  
33  
34  
35  
36  
37  
38  
39

40 *Statistical analyses*

41  
42 Follow-up started 6 months after date of first GLD treatment. We tabulated characteristics at the  
43 start of follow-up for users of metformin and sulfonylurea, respectively.  
44  
45  
46  
47

48 The men were followed until the outcome of interest, death, emigration, or end of study (7 October  
49 2016), whichever came first. The outcome of interest could be a diagnosis of BPH, a diagnosis of  
50 BPH and/ or a BPH-related prescription, and a diagnosis of BPH and/or a BPH-related prescription  
51 and/or acute urinary retention, respectively or it could be a TURP.  
52  
53  
54  
55  
56  
57  
58  
59  
60

1  
2  
3  
4 We computed incidence rates (IRs) for BPH (separately for the three BPH definitions and for  
5  
6 TURP, by dividing the number of incident outcome events by total exposed patient-time during  
7  
8 follow-up (expressed per 1,000 patient-years at risk). We used an intention to treat approach in our  
9  
10 main analysis in which we carried the GLD treatment used at follow-up start 6 month after GLD  
11  
12 initiation (metformin or sulfonylurea) forward. We constructed cumulative incidence curves to  
13  
14 illustrate time to BPH and/or BPH treatment while treating death as a competing risk.  
15  
16

17  
18 We also conducted an as treated analysis in which a patient was considered exposed to a certain  
19  
20 GLD as long as the prescription continued, based on the estimated number of days covered by the  
21  
22 pack size of a filled prescription + a 30 day wash-out period that accounted for overlapping  
23  
24 prescriptions and irregular drug use. In sensitivity analyses we changed the washout period to 0 and  
25  
26 90 days, respectively. In this analysis, we censored the patient if another GLD was added.  
27  
28 Additional censoring criteria were metformin or sulfonylurea treatment cessation and crossover to  
29  
30 the other study drug.  
31  
32

33  
34 We computed hazard ratios (HRs) of each definition of BPH (with 95% CIs) and of TURP  
35  
36 associated with the exposure categories described above (both intention to treat and as treated),  
37  
38 using Cox regression with sulfonylurea initiation as reference with adjustment for age, marital  
39  
40 status, diabetes duration, comorbidity (CCI level,) presence of micro- or macro-vascular  
41  
42 complications, HbA<sub>1c</sub> level achieved at start of follow-up, obesity, alcohol-related disease, use of  
43  
44 glucocorticoids, use of statins, and calendar period of first GLD treatment and we also stratified by  
45  
46 HbA<sub>1c</sub> level achieved at start of follow-up. We used a complete case analysis to handle missing  
47  
48 data. As sensitivity analysis we additionally analyzed the data using the missing indicator method  
49  
50  
51  
52  
53

#### 54 *Patient and public involvement*

55  
56  
57  
58 This research was done without involvement of patients.  
59  
60

### Research ethics

The study was approved by the Danish Data Protection Agency (Record number 2014-54-0922 KEA-2015-4). Since no patient contact was involved, no separate permission from the Danish Scientific Ethical Committee was required according to Danish Legislation.

### Results

In the Northern Denmark cohort, we identified 9,911 men without BPH who filled at least two prescriptions within 6 months after treatment start for either metformin or sulfonylurea in 2000-2006. Of these, 3,953 (40%) started metformin treatment and 5,987 (60%) started sulfonylurea (Table 1).

The median age was 57 years (interquartile range [IQR] 49-65) for metformin users and 63 years (IQR 54-72) for sulfonylurea users. In addition to being younger, metformin users had less micro-vascular (5.9% versus 9.0%) and macro-vascular complications (22.2% versus 28.1%). Median HbA<sub>1c</sub> levels achieved at start of follow-up were similar 6.9% (52 mmol/mol) versus 6.8% (51 mmol/mol). The prevalence of hospital-recorded obesity was highest in metformin users while the prevalence of other included comorbidities was higher in sulfonylurea users (Table 1). Metformin users had highest prevalence of statin use, 38.2% versus 27.7 % in sulfonylurea users but had slightly lower prevalence of hospital-diagnosed cardiovascular disease.

In the intention to treat analyses within up to 17 years of follow-up (median 10 years), 1,061 metformin users had a hospital-related BPH diagnosis or a BPH-related prescription corresponding to an IR per 1,000 PY of 33.36 (95% CI 31.35 to 35.37) and the 10-year cumulative incidence was 25.7 % (95% CI 24.2 to 27.1) (Table 2 and Figure 1). The IR per 1,000 PY in users of sulfonylurea was 40.32 (95% CI 38.45 to 42.20) and the 10-year cumulative incidence of hospital-related BPH

1  
2  
3  
4 was 27.4% (95% CI 26.2 to 28.6). Compared with sulfonylurea users, the crude HR for BPH  
5  
6 (diagnosis or a BPH-related prescription) was 0.83 (95% CI 0.77 to 0.89) and after adjustment it  
7  
8 was 0.97 (95% CI 0.88 to 1.06).  
9

10  
11  
12 The number of metformin users with a hospital-related diagnosis of BPH was 196, yielding an IR  
13  
14 per 1,000 PY of 5.30 (95% CI 4.56-6.04) and a 10-year cumulative incidence of 4.7% (95% CI 4.1  
15  
16 to 5.5). Compared with sulfonylurea users, the crude HR for hospital-related BPH was 0.63 (95%  
17  
18 CI 6.4 to 7.7) and after adjustment it was 0.87 (95% CI 0.70 to 1.08).  
19

20  
21  
22 When combining urinary retention and BPH (diagnosis and/or BPH-related prescriptions), the  
23  
24 adjusted HR was 0.97 (95% CI 0.88 to 1.07). For TURP the adjusted HR was 0.96 (95% C, 0.63 to  
25  
26 1.46) (Table 2).  
27

28  
29  
30 When we included GLD treatment as a time-varying exposure and assumed a 30-day washout  
31  
32 period, metformin users had a marginally lower BPH rate (adjusted HR = 0.91 [95% CI 0.81 to  
33  
34 1.02]). For hospital-related BPH the adjusted HR was 0.75 (95% CI 0.58 to 0.96) and for TURP the  
35  
36 adjusted HR was 0.83 (95% CI 0.50 to 1.35) (Table 2). Changing the washout period to 0 days and  
37  
38 90 days, respectively only marginally changed these estimates.  
39

40  
41  
42 When we stratified by HbA<sub>1c</sub> level in the intention to treat analyses, we observed a slightly lower  
43  
44 risk of hospital-related BPH diagnoses or use of BPH-related prescriptions in users of metformin  
45  
46 with HbA<sub>1c</sub> below <7% (53 mmol/mol) compared with sulfonylurea user with HbA<sub>1c</sub> below <7%  
47  
48 (53 mmol/mol), adjusted HR 0.91 (95% 0.80 to 1.03), while there was no beneficial effect among  
49  
50 those with HbA<sub>1c</sub> ≥7% (53 mmol/mol) (Table 3). Similarly results were found in the as treated  
51  
52 analyses with a 30-day washout period with use of metformin being associated with a slightly lower  
53  
54 risk of a hospital related BPH diagnosis or use of BPH-related prescriptions compared with use of  
55  
56  
57  
58  
59  
60

1  
2  
3  
4 sulfonylurea (HR =0.87 [95% CI 0.76 to 1.00]) in patients with a HbA<sub>1c</sub> <7% (53 mmol/mol)  
5  
6 (Table 3).  
7  
8

9  
10 Using the missing indicator method instead of complete case analysis to account for missing HbA<sub>1c</sub>  
11  
12 values did not affect the estimates. In the ITT analysis, the adjusted HR of BPH (diagnosis or a  
13  
14 BPH-related prescription) was 0.97 (95% CI 0.90 to 1.06) in the missing indicator analysis and 0.97  
15  
16 (95% CI 0.88 to 1.06) in the complete case analysis.  
17  
18

## 21 22 23 **Discussion**

24  
25  
26 In this population based cohort study including more than 9,000 men with type 2 diabetes who  
27  
28 started either metformin or sulfonylurea treatment as monotherapy in 2000-2006, we could not  
29  
30 confirm our hypothesis that users of metformin had substantially lower BPH rate than users of  
31  
32 sulfonylurea.  
33  
34

35  
36 Accordingly, the results from our study with much longer follow-up (median 10 years) thereby  
37  
38 largely supports the previous findings by Murff et al from the US national Veterans Health  
39  
40 Administration database<sup>13</sup> of no overall association between type of GLD treatment and BPH over  
41  
42 a mean follow-up of 1.4 years. Since we additionally took glycemic control into consideration, our  
43  
44 findings add to the existing literature.  
45  
46

47  
48 Due to the shared biologic mechanisms of BPH and cancer, our results also indirectly add to the  
49  
50 uncertainty regarding a causal role of metformin in prostate cancer. A recent meta-analysis found  
51  
52 no association between metformin use and prostate cancer risk (RR was 0.97, 95% CI 0.80, 1.16)  
53  
54 but had significant heterogeneity between studies<sup>27</sup>. Similarly, another systematic review included  
55  
56 a comprehensive bias evaluation and concluded that the studies least likely to be affected by bias  
57  
58  
59  
60



1  
2  
3  
4 did not support a causal effect of metformin on cancer risk<sup>28</sup>. A recent Taiwanese study found that  
5  
6 treatment with metformin reduced the risk of prostate cancer in men with Type 2 diabetes and BPH  
7  
8 (adjusted HR of 0.69 [95% CI 0.49, 0.96])<sup>8</sup> but found a similar effect of traditional Chinese  
9  
10 medicine which also points to a non-causal explanation. Thus, this issue remains unsettled.  
11  
12

13  
14 Use of nationwide medical registries allowed us to conduct a large population-based cohort study  
15  
16 with long and virtually complete follow-up. Patients with type 2 diabetes can be identified with at  
17  
18 least 90% completeness using Danish registries<sup>29</sup> and the positive predictive value is >95%, with  
19  
20 general practitioners registration as the gold standard. To minimize confounding by indication we  
21  
22 identified GLD initiators in a calendar period in which both metformin and sulfonylurea were  
23  
24 recommended and used as first-line treatment. Still, our study has some weaknesses that should be  
25  
26 considered. We identified men with BPH partly by diagnosis codes recorded in a hospital-based  
27  
28 setting, and these codes may not be entirely accurate. However, the positive predictive values of  
29  
30 other diagnosis codes in the group of urogenital diseases are between 75% and 100% in DNPR<sup>30</sup>.  
31  
32 We additionally included patients who were identified as having BPH based on the redemption of a  
33  
34 prescription for BPH-related medication. Still, we may have missed men with untreated BPH and  
35  
36 no contact to the hospital system. Since we do not expect the proportion of untreated BPH patients  
37  
38 to vary by type of GLD treatment, we do not, however, expect this to bias our relative estimates.  
39  
40  
41  
42  
43

44  
45 Also, several methodological challenges exist when comparing the effect of different GLDs and  
46  
47 these may affect our study. We categorized GLD treatment based on the choice of treatment during  
48  
49 the first 6 months after treatment start applying an intention to treat principle. Since patients may  
50  
51 switch between different GLDs, this approach likely leads to misclassification of treatment status  
52  
53 witch may bias the results towards the Null. We did, however, find similar tendency in our results  
54  
55 when using an as treated approach. Although metformin and sulfonylurea both were recommended  
56  
57 as first line drugs in our study period and have similar expected A1c-reducing efficiency, physicians  
58  
59  
60

1  
2  
3  
4 may have been more likely to prescribe sulfonylurea in patients with more severe type 2 diabetes  
5  
6 (including complications such as early signs of renal disease, or indicators of less insulin  
7  
8 production), and metformin in obese patients where weight gain or hypoglycemia was to be  
9  
10 avoided. Consistent with these expectations, we did observe different patient characteristics with  
11  
12 metformin users being younger, more obese, and fewer having micro-or macro-vascular  
13  
14 complications. Accordingly, even though we adjusted for these differences, residual confounding  
15  
16 could still be present. Unfortunately, measures of C-peptide was not available for this study period  
17  
18 and we could not take endogenous insulin secretion into account. We also lacked information about  
19  
20 lifestyle factors and in a previous Danish study smoking was more prevalent in users of  
21  
22 sulfonylurea compared with users of metformin <sup>16</sup>. Yet, an association between smoking and BPH  
23  
24 is not clearly established <sup>31</sup>. Furthermore, unmeasured confounding due to differences in factors  
25  
26 related to unhealthy lifestyle and less social support between users of metformin and sulfonylurea  
27  
28 might have influenced our findings as well.  
29  
30  
31  
32  
33

34  
35 In conclusion, metformin did not seem to substantially reduce the risk of BPH in men with diabetes  
36  
37 compared with sulfonylurea.  
38  
39  
40  
41  
42  
43  
44  
45  
46  
47  
48  
49  
50  
51  
52  
53  
54  
55  
56  
57  
58  
59  
60

1  
2  
3  
4 **Contributorship statement:** MN designed the study, supervised the analyses, interpreted the data,  
5  
6 and wrote the manuscript. BD contributed to the design of the study, cleaned the data, conducted  
7  
8 the statistical analyses, interpreted the data, and revised the manuscript critically. RWT contributed  
9  
10 to the planning and design of the study, acquired the data, supervised the analyses, interpreted the  
11  
12 data, and revised the manuscript critically. All authors read and approved the final manuscript.  
13  
14

15  
16 **Funding:** Aarhus University funded the study. The Department of Clinical Epidemiology, Aarhus  
17  
18 University Hospital, is a member of The Danish Centre for Strategic Research in Type 2 Diabetes  
19  
20 (DD2), supported by the Danish Agency for Science (grant nos. 09-067009 and 09-075724), the  
21  
22 Danish Health and Medicines Authority, the Danish Diabetes Association, and an unrestricted  
23  
24 donation from Novo Nordisk A/S. Project partners are listed on the website [www.DD2.nu](http://www.DD2.nu). The  
25  
26 Department of Clinical Epidemiology, Aarhus University Hospital, participates in the International  
27  
28 Diabetic Neuropathy Consortium (IDNC) research program, which is supported by a Novo Nordisk  
29  
30 Foundation Challenge Programme grant (grant no. NNF14SA000 6). The Department of Clinical  
31  
32 Epidemiology is involved in studies with funding from various companies as research grants to (and  
33  
34 administered by) Aarhus University. None of these studies are related to the current study. The  
35  
36 funder had no role in the study design, data analysis, interpretation of data, or writing of the  
37  
38 manuscript.  
39  
40  
41  
42  
43  
44

45 **Competing interests:** None declared.  
46  
47

48 **Patient consent for publication:** Not required for registry-based research  
49  
50

51 **Ethics approval:** Ethics approval is not needed for purely registry-based studies in Denmark.  
52  
53

54 Patients were not involved in setting the research question, the outcome measures, or the design or  
55  
56 implementation of the study. There are no plans to involve patients in dissemination of the results.  
57  
58

59 **Data Sharing:** No additional data available  
60

## References

1. Maserejian NN, Chen S, Chiu GR, et al. Incidence of lower urinary tract symptoms in a population-based study of men and women. *Urology* 2013;82(3):560-4. doi: 10.1016/j.urology.2013.05.009 [published Online First: 2013/07/24]
2. Marshall LM, Holton KF, Parsons JK, et al. Lifestyle and health factors associated with progressing and remitting trajectories of untreated lower urinary tract symptoms among elderly men. *Prostate cancer and prostatic diseases* 2014;17(3):265-72. doi: 10.1038/pcan.2014.22 [published Online First: 2014/07/09]
3. Parsons JK. Lifestyle factors, benign prostatic hyperplasia, and lower urinary tract symptoms. *Current opinion in urology* 2011;21(1):1-4. doi: 10.1097/MOU.0b013e32834100c9 [published Online First: 2010/11/04]
4. Gandaglia G, Zaffuto E, Fossati N, et al. The role of prostatic inflammation in the development and progression of benign and malignant diseases. *Current opinion in urology* 2017;27(2):99-106. doi: 10.1097/mou.0000000000000369 [published Online First: 2016/12/03]
5. Hammarsten J, Pecker R. Urological aspects of the metabolic syndrome. *Nature reviews Urology* 2011;8(9):483-94. doi: 10.1038/nrurol.2011.112 [published Online First: 2011/08/04]
6. Haring A, Murtola TJ, Talala K, et al. Antidiabetic drug use and prostate cancer risk in the Finnish Randomized Study of Screening for Prostate Cancer. *Scandinavian journal of urology* 2017;51(1):5-12. doi: 10.1080/21681805.2016.1271353 [published Online First: 2017/01/14]
7. Preston MA, Riis AH, Ehrenstein V, et al. Metformin use and prostate cancer risk. *European urology* 2014;66(6):1012-20. doi: 10.1016/j.eururo.2014.04.027 [published Online First: 2014/05/27]
8. Kuo YJ, Sung FC, Hsieh PF, et al. Metformin reduces prostate cancer risk among men with benign prostatic hyperplasia: A nationwide population-based cohort study. *Cancer medicine* 2019 doi: 10.1002/cam4.2025 [published Online First: 2019/04/11]
9. Currie CJ, Poole CD, Gale EAM. The influence of glucose-lowering therapies on cancer risk in type 2 diabetes. *Diabetologia* 2009;52(9):1766-77. doi: 10.1007/s00125-009-1440-6 [published Online First: 07/02]
10. Farmer RE, Ford D, Mathur R, et al. Metformin use and risk of cancer in patients with type 2 diabetes: a cohort study of primary care records using inverse probability weighting of marginal structural models. *International journal of epidemiology* 2019;48(2):527-37. doi: 10.1093/ije/dyz005 [published Online First: 2019/02/13]
11. Tsilidis KK, Capothanassi D, Allen NE, et al. Metformin does not affect cancer risk: a cohort study in the U.K. Clinical Practice Research Datalink analyzed like an intention-to-treat trial. *Diabetes care* 2014;37(9):2522-32. doi: 10.2337/dc14-0584 [published Online First: 2014/06/06]
12. Wang Z, Xiao X, Ge R, et al. Metformin inhibits the proliferation of benign prostatic epithelial cells. *PloS one* 2017;12(3):e0173335. doi: 10.1371/journal.pone.0173335 [published Online First: 2017/03/03]
13. Murff HJ, Roumie CL, Greevy RA, et al. Thiazolidinedione and Metformin Use and the Risk of Benign Prostate Hyperplasia in Veterans with Diabetes Mellitus. *Journal of men's health* 2014;11(4):157-62. doi: 10.1089/jomh.2014.0051 [published Online First: 2015/03/24]
14. Hong Y, Lee S, Won S. The preventive effect of metformin on progression of benign prostate hyperplasia: A nationwide population-based cohort study in Korea. *PloS one* 2019;14(7):e0219394. doi: 10.1371/journal.pone.0219394 [published Online First: 2019/07/20]
15. Davies MJ, D'Alessio DA, Fradkin J, et al. Management of hyperglycaemia in type 2 diabetes, 2018. A consensus report by the American Diabetes Association (ADA) and the European Association for the Study of Diabetes (EASD). *Diabetologia* 2018;61(12):2461-98. doi: 10.1007/s00125-018-4729-5
16. Ulrichsen SP, Mor A, Svensson E, et al. Lifestyle factors associated with type 2 diabetes and use of different glucose-lowering drugs: cross-sectional study. *PloS one* 2014;9(11):e111849. doi: 10.1371/journal.pone.0111849 [published Online First: 2014/11/05]

1  
2  
3  
4  
5  
6  
7  
8  
9  
10  
11  
12  
13  
14  
15  
16  
17  
18  
19  
20  
21  
22  
23  
24  
25  
26  
27  
28  
29  
30  
31  
32  
33  
34  
35  
36  
37  
38  
39  
40  
41  
42  
43  
44  
45  
46  
47  
48  
49  
50  
51  
52  
53  
54  
55  
56  
57  
58  
59  
60

17. Effect of intensive blood-glucose control with metformin on complications in overweight patients with type 2 diabetes (UKPDS 34). UK Prospective Diabetes Study (UKPDS) Group. *Lancet* 1998;352(9131):854-65. [published Online First: 1998/09/22]
18. Holman RR, Paul SK, Bethel MA, et al. 10-year follow-up of intensive glucose control in type 2 diabetes. *The New England journal of medicine* 2008;359(15):1577-89. doi: 10.1056/NEJMoa0806470 [published Online First: 2008/09/12]
19. Global Guideline for Type 2 Diabetes: recommendations for standard, comprehensive, and minimal care. *Diabetic medicine : a journal of the British Diabetic Association* 2006;23(6):579-93. doi: 10.1111/j.1464-5491.2006.01918.x [published Online First: 2006/06/09]
20. Nathan DM, Buse JB, Davidson MB, et al. Management of hyperglycemia in type 2 diabetes: A consensus algorithm for the initiation and adjustment of therapy: a consensus statement from the American Diabetes Association and the European Association for the Study of Diabetes. *Diabetes care* 2006;29(8):1963-72. doi: 10.2337/dc06-9912 [published Online First: 2006/07/29]
21. Medicinsk Kompendium. 16 ed: Nyt Nordisk Forlag Arnold Busck 2004.
22. Schmidt M, Pedersen L, Sorensen HT. The Danish Civil Registration System as a tool in epidemiology. *European journal of epidemiology* 2014;29(8):541-9. doi: 10.1007/s10654-014-9930-3 [published Online First: 2014/06/27]
23. Schmidt M, Schmidt SA, Sandegaard JL, et al. The Danish National Patient Registry: a review of content, data quality, and research potential. *Clin Epidemiol* 2015;7:449-90. doi: 10.2147/CLEP.S91125 [doi];clep-7-449 [pii]
24. Ehrenstein V, Antonsen S, Pedersen L. Existing data sources for clinical epidemiology: Aarhus University Prescription Database. *Clinical epidemiology* 2010;2:273-9. doi: 10.2147/clep.s13458 [published Online First: 2010/12/15]
25. Selius BA, Subedi R. Urinary retention in adults: diagnosis and initial management. *American family physician* 2008;77(5):643-50. [published Online First: 2008/03/21]
26. Grann AF, Erichsen R, Nielsen AG, et al. Existing data sources for clinical epidemiology: The clinical laboratory information system (LABKA) research database at Aarhus University, Denmark. *Clinical epidemiology* 2011;3:133-8. doi: 10.2147/clep.s17901 [published Online First: 2011/04/14]
27. Feng Z, Zhou X, Liu N, et al. Metformin use and prostate cancer risk: A meta-analysis of cohort studies. *Medicine* 2019;98(12):e14955-e55. doi: 10.1097/MD.00000000000014955
28. Farmer RE, Ford D, Forbes HJ, et al. Metformin and cancer in type 2 diabetes: a systematic review and comprehensive bias evaluation. *International journal of epidemiology* 2017;46(2):728-44. doi: 10.1093/ije/dyw275
29. Carstensen B, Kristensen JK, Marcussen MM, et al. The National Diabetes Register. *Scandinavian journal of public health* 2011;39(7 Suppl):58-61. doi: 10.1177/1403494811404278 [published Online First: 2011/08/04]
30. Schmidt M, Schmidt SA, Sandegaard JL, et al. The Danish National Patient Registry: a review of content, data quality, and research potential. *Clinical epidemiology* 2015;7:449-90. doi: 10.2147/clep.s91125 [published Online First: 2015/11/26]
31. Xu H, Fu S, Chen Y, et al. Smoking habits and benign prostatic hyperplasia: A systematic review and meta-analysis of observational studies. *Medicine (Baltimore)* 2016;95(32):e4565. doi: 10.1097/md.0000000000004565 [published Online First: 2016/08/12]

**Table 1.** Baseline characteristics of men initiating either metformin or sulfonylurea monotherapy

| Characteristics                  | Metformin    | Sulfonylurea |
|----------------------------------|--------------|--------------|
|                                  | N (%)        | N (%)        |
| Total                            | 3,953        | 5,958        |
| Median age (Interquartile range) | 57 (49–65)   | 63 (54–72)   |
| Age group                        |              |              |
| 30 to <50 years                  | 1,003 (25.4) | 822 (13.8)   |
| 50 to <70 years                  | 2,373 (60.0) | 3,267 (54.8) |
| ≥70 years                        | 577 (14.6)   | 1,869 (31.4) |
| Year of study inclusion          |              |              |
| 2000-2002                        | 1,104 (27.9) | 2,726 (45.8) |
| 2003-2006                        | 2,849 (72.1) | 3,232 (54.2) |
| Marital status                   |              |              |
| Married                          | 2,435 (61.6) | 3,890 (65.3) |
| Never married                    | 681 (17.2)   | 765 (12.8)   |
| Divorced                         | 536 (13.6)   | 657 (11.0)   |
| Widowed                          | 223 (5.6)    | 597 (10.0)   |
| Missing                          | 78 (2.0)     | 49 (0.8)     |
| Diabetes duration                |              |              |
| Newly diagnosed                  | 2,328 (58.9) | 3,759 (63.1) |
| <1 year                          | 1,047 (26.5) | 1,367 (22.9) |
| 1-5 years                        | 409 (10.3)   | 532 (8.9)    |
| >5 years                         | 169 (4.3)    | 300 (5.0)    |
| Diabetes complications           |              |              |
| Microvascular                    | 235 (5.9)    | 535 (9.0)    |
| Macrovascular                    | 878 (22.2)   | 1,677 (28.1) |
| Hemoglobin A1c level             |              |              |

|                                  |              |              |
|----------------------------------|--------------|--------------|
| < 7 % (53mmol/mol)               | 1,542 (39.0) | 2,243 (37.6) |
| 7-<8 % (53-<64 mmol/mol)         | 769 (19.5)   | 980 (16.4)   |
| ≥8 % (64 mmol/mol)               | 561 (14.2)   | 839 (14.1)   |
| Missing                          | 1,081 (27.3) | 1,896 (31.8) |
| Comorbidities                    |              |              |
| Myocardial infarction            | 304 (7.7)    | 624 (10.5)   |
| Congestive heart failure         | 175 (4.4)    | 435 (7.3)    |
| Peripheral vascular disease      | 132 (3.3)    | 342 (5.7)    |
| Cerebrovascular disease          | 299 (7.6)    | 546 (9.2)    |
| Chronic pulmonary disease        | 305 (7.7)    | 537 (9.0)    |
| Cancer                           | 138 (3.5)    | 365 (6.1)    |
| Obesity                          | 501 (12.7)   | 313 (5.3)    |
| Alcoholism-related disorders     | 184 (4.7)    | 328 (5.5)    |
| Charlson comorbidity Index score |              |              |
| 0                                | 1,910 (48.3) | 2,781 (46.7) |
| 1-2                              | 1,677 (42.4) | 2,270 (38.1) |
| >2                               | 366 (9.3)    | 907 (15.2)   |
| Statins ever use                 | 1,511 (38.2) | 1,652 (27.7) |
| Immunosuppressants               | 25 (0.6)     | 51 (0.9)     |
| Oral corticosteroids             | 228 (5.8)    | 495 (8.3)    |

- Treatment initiation was defined as at least 2 prescriptions for the same drug and no prescriptions for other glucose lowering drugs prescribed during the first 6 months of treatment.
- Characteristics were measured at date of treatment start except Hemoglobin A<sub>1c</sub> level which was measured at start of follow-up 6 months after treatment start.

Table 2. Occurrence of benign prostatic hyperplasia in men with diabetes according to treatment initiation with metformin or sulfonylurea

|                                                                               | Intention to treat analysis |                     | As treated analysis |                     |
|-------------------------------------------------------------------------------|-----------------------------|---------------------|---------------------|---------------------|
|                                                                               | Metformin                   | Sulfonylurea        | Metformin           | Sulfonylurea        |
| <b>BPH diagnosis or use of BPH-related drugs</b>                              |                             |                     |                     |                     |
| Number                                                                        | 1,061                       | 1,773               | 774                 | 1,299               |
| Rate per 1,000 PY (95% CI)                                                    | 33.36 (31.35-35.37)         | 40.32 (38.45-42.20) | 31.21 (29.01-33.41) | 39.98 (37.81-42.16) |
| Crude HR (95% CI)                                                             | 0.83 (0.77 to 0.89)         | (ref)               | 0.78 (0.71 to 0.85) | (ref)               |
| Adjusted HR (95% CI)                                                          | 0.97 (0.88 to 1.07)         | (ref)               | 0.91 (0.81 to 1.02) | (ref)               |
| <b>BPH diagnosis</b>                                                          |                             |                     |                     |                     |
| Number                                                                        | 196                         | 441                 | 139                 | 330                 |
| Rate per 1,000 PY (95% CI)                                                    | 5.30 (4.56-6.04)            | 8.49 (7.70-9.28)    | 4.88 (4.07-5.69)    | 8.77 (7.82-9.72)    |
| Crude HR (95% CI)                                                             | 0.62 (0.53 to 0.74)         | (ref)               | 0.56 (0.46 to 0.68) | (ref)               |
| Adjusted HR (95% CI)                                                          | 0.87 (0.70 to 1.08)         | (ref)               | 0.75 (0.58 to 0.96) | (ref)               |
| <b>BPH diagnosis or use of BPH related prescriptions or urinary retention</b> |                             |                     |                     |                     |
| Number                                                                        | 1,124                       | 1,885               | 826                 | 1,392               |
| Rate per 1,000 PY (95% CI)                                                    | 35.59 (33.51-37.67)         | 43.18 (41.23-45.13) | 33.53 (31.24-35.82) | 43.15 (40.88-45.42) |
| Crude HR (95% CI)                                                             | 0.83 (0.77 to 0.89)         | (ref)               | 0.78 (0.7 to 0.85)  | (ref)               |
| Adjusted HR* (95% CI)                                                         | 0.97 (0.88 to 1.07)         | (ref)               | 0.91 (0.81 to 1.01) | (ref)               |
| <b>Trans-urethral resection of the prostate</b>                               |                             |                     |                     |                     |
| Number                                                                        | 63                          | 125                 | 42                  | 94                  |
| Rate per 1,000 PY (95% CI)                                                    | 1.67 (1.25-2.08)            | 2.33 (1.92-2.73)    | 1.45 (1.01-1.88)    | 2.42 (1.93-2.90)    |
| Crude HR (95% CI)                                                             | 0.72 (0.53 to 0.98)         | (ref)               | 0.61 (0.42 to 0.87) | (ref)               |
| Adjusted HR (95% CI)                                                          | 0.96 (0.63 to 1.46)         | (ref)               | 0.83 (0.50 to 1.35) | (ref)               |



- 1  
2  
3  
4  
5  
6  
7  
8  
9  
10  
11  
12  
13  
14  
15  
16  
17  
18  
19  
20  
21  
22  
23  
24  
25  
26  
27  
28  
29  
30  
31  
32  
33  
34  
35  
36  
37  
38  
39  
40  
41  
42  
43  
44  
45  
46  
47  
48  
49  
50  
51  
52  
53  
54  
55  
56  
57  
58  
59  
60
- Numbers, rates per 1,000 person years (PY), and hazard ratios (HRs) of benign prostatic hyperplasia (BPH) within up to 17 years of follow-up in men with diabetes according to initial treatment with metformin or sulfonylurea (intention to treat) and analyzed in an as treated approach (i.e time-varying exposure including a 30-day wash-out period).
  - HRs were adjusted for age, Charlson comorbidity index score, calendar period of diagnosis, marital status, HbA1c-level, microvascular and macro-vascular complications, obesity, and alcohol related disease, use of corticosteroids, use of statins and diabetes duration.

For peer review only

**Table 3.** Association between metformin and sulfonylurea initiation and occurrence of benign prostatic hyperplasia stratified by hemoglobin A<sub>1c</sub> level.

|                           | HbA <sub>1c</sub>      |                        |                               |                        |                        |                        |
|---------------------------|------------------------|------------------------|-------------------------------|------------------------|------------------------|------------------------|
|                           | <7 % (53mmol/mol)      |                        | 7 to <8% (53 to <64 mmol/mol) |                        | ≥ 8 % (64 mmol/mol)    |                        |
|                           | Crude HR<br>(95% CI)   | Adj HR<br>(95% CI)     | Crude HR<br>(95% CI)          | Adj HR<br>(95% CI)     | Crude HR<br>(95% CI)   | Adj HR<br>(95% CI)     |
| <b>Intention to treat</b> |                        |                        |                               |                        |                        |                        |
| Metformin                 | 0.78<br>(0.69 to 0.88) | 0.91<br>(0.80 to 1.03) | 0.86<br>(0.72 to 1.02)        | 1.03<br>(0.85 to 1.25) | 0.92<br>(0.74 to 1.15) | 1.07<br>(0.71 to 1.63) |
| Sulfonylurea              | (ref)                  | (ref)                  | (ref)                         | (ref)                  | (ref)                  | (ref)                  |
| <b>As treated</b>         |                        |                        |                               |                        |                        |                        |
| Metformin                 | 0.75<br>(0.66 to 0.86) | 0.87<br>(0.76 to 1.00) | 0.78<br>(0.63 to 0.96)        | 0.95<br>(0.75 to 1.20) | 0.90<br>(0.68 to 1.20) | 0.99<br>(0.72 to 1.34) |
| Sulfonylurea              | (ref)                  | (ref)                  | (ref)                         | (ref)                  | (ref)                  | (ref)                  |

- Crude and adjusted (adj) hazard ratios (HRs) of benign prostatic hyperplasia (BPH) defined as either a hospital-related BPH diagnosis or a first BHP-related prescription in men with diabetes according to initial treatment (intention to treat) and an as treated approach (including a 30 days washout period) stratified by hemoglobin A<sub>1c</sub> level (HbA<sub>1c</sub>).
- HRs were adjusted for age, Charlson comorbidity index score, calendar period of diagnosis, marital status, microvascular complications, macrovascular complications, obesity, and alcohol related disease, use of corticosteroids, use of statins, and diabetes duration.

1  
2  
3  
4 **Figure legends**  
5

6  
7 Figure 1 Cumulative incidence of a hospital-related diagnosis of benign prostatic hyperplasia (BPH)  
8 or a prescription for BPH-related treatment in men with type 2 diabetes according to metformin or  
9  
10  
11  
12 sulfonyleurea treatment. Death is regarded as a competing risk.  
13  
14  
15  
16  
17  
18  
19  
20  
21  
22  
23  
24  
25  
26  
27  
28  
29  
30  
31  
32  
33  
34  
35  
36  
37  
38  
39  
40  
41  
42  
43  
44  
45  
46  
47  
48  
49  
50  
51  
52  
53  
54  
55  
56  
57  
58  
59  
60

For peer review only

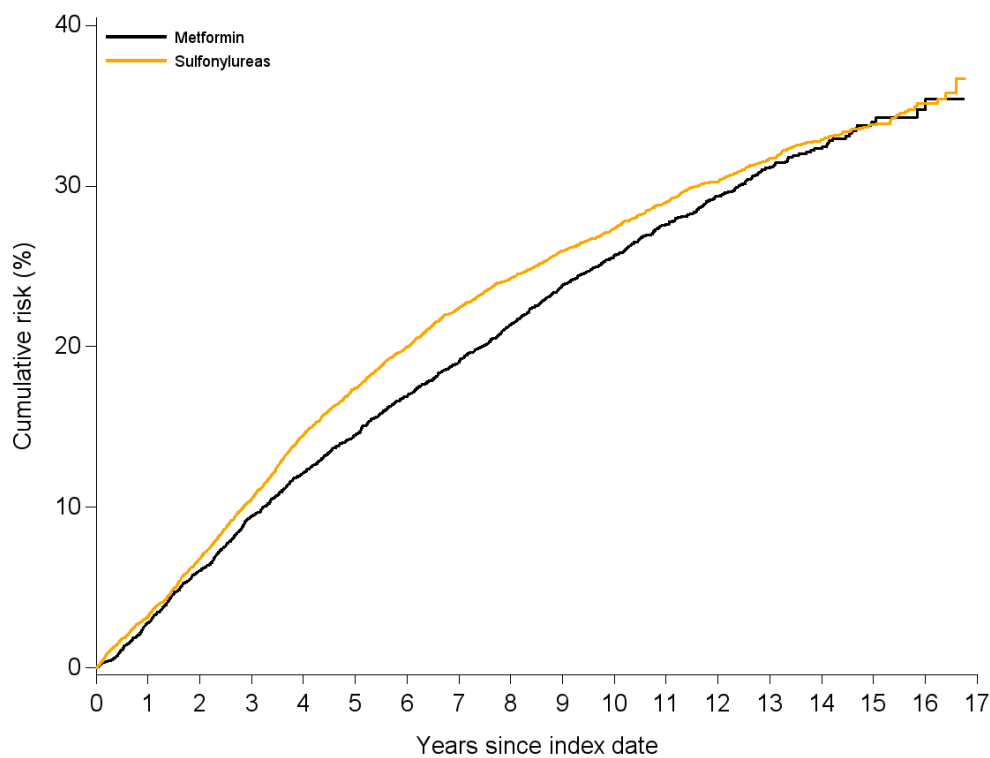

Figure 1 Cumulative incidence of a hospital-related diagnosis of benign prostatic hyperplasia (BPH) or a prescription for BPH-related treatment in men with type 2 diabetes according to metformin or sulfonylurea treatment. Death is regarded as a competing risk.

1  
2  
3  
4 **Supplementary data**  
5

6  
7 Diagnosis, procedure and medication codes used in the study  
8  
9

10 **Hospital contact for type 2 diabetes**  
11

12  
13 ICD-8-codes: 249.x, 250.x.  
14

15  
16 ICD-10-codes: E10.x, E11.x, E14.x, G63.2.x, H36.0, N08.3  
17  
18

19  
20 **Glucose-lowering drugs ATC-codes:**  
21

22  
23 Metformin: A10BAxx; Sulfonylureas: A10BBxx; Insulin and analogues: A10Axxx;  
24

25  
26 Dipeptidyl peptidase 4 (DPP 4) inhibitors: A10BHxx; Glucagon-like peptide 1  
27

28  
29 (GLP-1) analogue: A10BX04, A10BX05, A10BX07, A10BX10; Maglitinides: A10BX02,  
30

31  
32 A10BX03, A10BX08; Other glucose-lowering drugs: A10BFxx (alpha glucosidase  
33

34  
35 inhibitor), A10BGxx (Thiazolidinedione); Combination tablets: A10BDxx  
36  
37

38  
39 **BPH:**  
40

41  
42 ICD-8 codes: 600, ICD-10:N40  
43  
44

45 **Transurethral resection of the prostate (TURP):**  
46

47  
48 Procedure code (Nomesco): KKED22  
49

50  
51 **BPH-related medical treatments:**  
52

53  
54 alpha-blockers: ATC-codes: C02CA, G04CA  
55

56  
57 5-alpha reductase inhibitors (ATC code: G04)  
58  
59  
60

**Microvascular complications:**

Nephropathy: ICD-8-codes: 25002, 24902

ICD-10-codes: E102, E112, E142, I120, N083, N06, N17, N18, N19, R809, BJFD2

Retinopathy ICD-8-codes: 25001, 24901

ICD-10-codes: E103, E113, E123, E133, E143, H340, H341, H342, H280, H334, H450, H360,

H540, H541, H544, H25, H268, H269, H430, H431, H438C, H439, H334A, H330, H335

Neuropathy ICD-8-codes: 25003, 24903

ICD-10-codes: E104, E114, E124, E134, E144, G590, G632, G603, G609, G618, G619, G620,

G621, G622, G628, G629, G630, G631, G634, G635, G636, G638, G730, G990,

**Macrovascular complications:**

ICD-8-codes: 410, 411, 412, 413, 414, 432, 433, 434, 435, 436, 437, 440

ICD-10-codes: I20, I21, I22, I23, I24, I25, I61, I63, I64, I65, I66, I672, I678, I679, I691, I693, I698,

I702, I742, I745, I739, I792, E105, E115, E125, E135, E145

**Alcoholism-related disorders:**

ICD-10-codes: K70, K852, K860, E244, F101, F102, F103, F104, F105, F106, F107,

F108, F109, G621, G721, G312, I426, K292, Z721, T500A, E529A, Z502, Z714

**Statin use:** ATC-code: B04AB

**Immunosuppressant use:** ATC-codes: L01, L04

**Oral corticosteroid use:** ATC-code: H02AB

## STROBE Statement—checklist of items that should be included in reports of observational studies

|                              | Item No | Recommendation                                                                                                                                                                                                                                                                                                                                                                                                                                                         | Page number |
|------------------------------|---------|------------------------------------------------------------------------------------------------------------------------------------------------------------------------------------------------------------------------------------------------------------------------------------------------------------------------------------------------------------------------------------------------------------------------------------------------------------------------|-------------|
| <b>Title and abstract</b>    | 1       | (a) Indicate the study's design with a commonly used term in the title or the abstract                                                                                                                                                                                                                                                                                                                                                                                 | 1           |
|                              |         | (b) Provide in the abstract an informative and balanced summary of what was done and what was found                                                                                                                                                                                                                                                                                                                                                                    | 2           |
| <b>Introduction</b>          |         |                                                                                                                                                                                                                                                                                                                                                                                                                                                                        |             |
| Background/rationale         | 2       | Explain the scientific background and rationale for the investigation being reported                                                                                                                                                                                                                                                                                                                                                                                   | 5-6         |
| Objectives                   | 3       | State specific objectives, including any prespecified hypotheses                                                                                                                                                                                                                                                                                                                                                                                                       | 6           |
| <b>Methods</b>               |         |                                                                                                                                                                                                                                                                                                                                                                                                                                                                        |             |
| Study design                 | 4       | Present key elements of study design early in the paper                                                                                                                                                                                                                                                                                                                                                                                                                | 6           |
| Setting                      | 5       | Describe the setting, locations, and relevant dates, including periods of recruitment, exposure, follow-up, and data collection                                                                                                                                                                                                                                                                                                                                        | 6-7         |
| Participants                 | 6       | (a) <i>Cohort study</i> —Give the eligibility criteria, and the sources and methods of selection of participants. Describe methods of follow-up<br><i>Case-control study</i> —Give the eligibility criteria, and the sources and methods of case ascertainment and control selection. Give the rationale for the choice of cases and controls<br><i>Cross-sectional study</i> —Give the eligibility criteria, and the sources and methods of selection of participants | 7+9         |
|                              |         | (b) <i>Cohort study</i> —For matched studies, give matching criteria and number of exposed and unexposed<br><i>Case-control study</i> —For matched studies, give matching criteria and the number of controls per case                                                                                                                                                                                                                                                 |             |
| Variables                    | 7       | Clearly define all outcomes, exposures, predictors, potential confounders, and effect modifiers. Give diagnostic criteria, if applicable                                                                                                                                                                                                                                                                                                                               | 8-9         |
| Data sources/<br>measurement | 8*      | For each variable of interest, give sources of data and details of methods of assessment (measurement). Describe comparability of assessment methods if there is more than one group                                                                                                                                                                                                                                                                                   | 7-9         |
| Bias                         | 9       | Describe any efforts to address potential sources of bias                                                                                                                                                                                                                                                                                                                                                                                                              | 10          |
| Study size                   | 10      | Explain how the study size was arrived at                                                                                                                                                                                                                                                                                                                                                                                                                              | 11          |
| Quantitative variables       | 11      | Explain how quantitative variables were handled in the analyses. If applicable, describe which groupings were chosen and why                                                                                                                                                                                                                                                                                                                                           | 9-10        |
| Statistical methods          | 12      | (a) Describe all statistical methods, including those used to control for confounding                                                                                                                                                                                                                                                                                                                                                                                  | 10          |
|                              |         | (b) Describe any methods used to examine subgroups and interactions                                                                                                                                                                                                                                                                                                                                                                                                    | N/A         |
|                              |         | (c) Explain how missing data were addressed                                                                                                                                                                                                                                                                                                                                                                                                                            | 9           |
|                              |         | (d) <i>Cohort study</i> —If applicable, explain how loss to follow-up was addressed<br><i>Case-control study</i> —If applicable, explain how matching of cases and controls was addressed<br><i>Cross-sectional study</i> —If applicable, describe analytical methods taking account of sampling strategy                                                                                                                                                              | N/A         |
|                              |         | (e) Describe any sensitivity analyses                                                                                                                                                                                                                                                                                                                                                                                                                                  | 10          |

Continued on next page

1  
2  
3  
4  
5  
6  
7  
8  
9  
10  
11  
12  
13  
14  
15  
16  
17  
18  
19  
20  
21  
22  
23  
24  
25  
26  
27  
28  
29  
30  
31  
32  
33  
34  
35  
36  
37  
38  
39  
40  
41  
42  
43  
44  
45  
46  
47  
48  
49  
50  
51  
52  
53  
54  
55  
56  
57  
58  
59  
60

| <b>Results</b>           |     |                                                                                                                                                                                                                                                                                                 |                |
|--------------------------|-----|-------------------------------------------------------------------------------------------------------------------------------------------------------------------------------------------------------------------------------------------------------------------------------------------------|----------------|
| Participants             | 13* | (a) Report numbers of individuals at each stage of study—eg numbers potentially eligible, examined for eligibility, confirmed eligible, included in the study, completing follow-up, and analysed<br>(b) Give reasons for non-participation at each stage<br>(c) Consider use of a flow diagram | 11             |
| Descriptive data         | 14* | (a) Give characteristics of study participants (eg demographic, clinical, social) and information on exposures and potential confounders                                                                                                                                                        | Table 1        |
|                          |     | (b) Indicate number of participants with missing data for each variable of interest                                                                                                                                                                                                             | Table 1        |
|                          |     | (c) <i>Cohort study</i> —Summarise follow-up time (eg, average and total amount)                                                                                                                                                                                                                | 11             |
| Outcome data             | 15* | <i>Cohort study</i> —Report numbers of outcome events or summary measures over time                                                                                                                                                                                                             | Table 2        |
|                          |     | <i>Case-control study</i> —Report numbers in each exposure category, or summary measures of exposure                                                                                                                                                                                            |                |
|                          |     | <i>Cross-sectional study</i> —Report numbers of outcome events or summary measures                                                                                                                                                                                                              |                |
| Main results             | 16  | (a) Give unadjusted estimates and, if applicable, confounder-adjusted estimates and their precision (eg, 95% confidence interval). Make clear which confounders were adjusted for and why they were included                                                                                    | 11-12 + tables |
|                          |     | (b) Report category boundaries when continuous variables were categorized                                                                                                                                                                                                                       |                |
|                          |     | (c) If relevant, consider translating estimates of relative risk into absolute risk for a meaningful time period                                                                                                                                                                                | Figure 1       |
| Other analyses           | 17  | Report other analyses done—eg analyses of subgroups and interactions, and sensitivity analyses                                                                                                                                                                                                  |                |
| <b>Discussion</b>        |     |                                                                                                                                                                                                                                                                                                 |                |
| Key results              | 18  | Summarise key results with reference to study objectives                                                                                                                                                                                                                                        | 13             |
| Limitations              | 19  | Discuss limitations of the study, taking into account sources of potential bias or imprecision. Discuss both direction and magnitude of any potential bias                                                                                                                                      | 14-15          |
| Interpretation           | 20  | Give a cautious overall interpretation of results considering objectives, limitations, multiplicity of analyses, results from similar studies, and other relevant evidence                                                                                                                      | 14-15          |
| Generalisability         | 21  | Discuss the generalisability (external validity) of the study results                                                                                                                                                                                                                           |                |
| <b>Other information</b> |     |                                                                                                                                                                                                                                                                                                 |                |
| Funding                  | 22  | Give the source of funding and the role of the funders for the present study and, if applicable, for the original study on which the present article is based                                                                                                                                   | 15             |

\*Give information separately for cases and controls in case-control studies and, if applicable, for exposed and unexposed groups in cohort and cross-sectional studies.

**Note:** An Explanation and Elaboration article discusses each checklist item and gives methodological background and published examples of transparent reporting. The STROBE checklist is best used in conjunction with this article (freely available on the Web sites of PLoS Medicine at <http://www.plosmedicine.org/>, Annals of Internal Medicine at <http://www.annals.org/>, and Epidemiology at <http://www.epidem.com/>). Information on the STROBE Initiative is available at [www.strobe-statement.org](http://www.strobe-statement.org).



# BMJ Open

## Metformin use and long-term risk of benign prostatic hyperplasia. A population-based cohort study.

|                                 |                                                                                                                                                                                                                                                            |
|---------------------------------|------------------------------------------------------------------------------------------------------------------------------------------------------------------------------------------------------------------------------------------------------------|
| Journal:                        | <i>BMJ Open</i>                                                                                                                                                                                                                                            |
| Manuscript ID                   | bmjopen-2020-041875.R1                                                                                                                                                                                                                                     |
| Article Type:                   | Original research                                                                                                                                                                                                                                          |
| Date Submitted by the Author:   | 26-Oct-2020                                                                                                                                                                                                                                                |
| Complete List of Authors:       | Nørgaard, Mette; Aarhus University Hospital, Department of Clinical Epidemiology<br>Darvalics, Bianka; Aarhus University Hospital, Department of Clinical Epidemiology<br>Thomsen, Reimar; Aarhus University Hospital, Department of Clinical Epidemiology |
| <b>Primary Subject Heading</b>: | Urology                                                                                                                                                                                                                                                    |
| Secondary Subject Heading:      | Diabetes and endocrinology, Epidemiology                                                                                                                                                                                                                   |
| Keywords:                       | DIABETES & ENDOCRINOLOGY, Adult urology < UROLOGY, EPIDEMIOLOGY                                                                                                                                                                                            |
|                                 |                                                                                                                                                                                                                                                            |

SCHOLARONE™  
Manuscripts



I, the Submitting Author has the right to grant and does grant on behalf of all authors of the Work (as defined in the below author licence), an exclusive licence and/or a non-exclusive licence for contributions from authors who are: i) UK Crown employees; ii) where BMJ has agreed a CC-BY licence shall apply, and/or iii) in accordance with the terms applicable for US Federal Government officers or employees acting as part of their official duties; on a worldwide, perpetual, irrevocable, royalty-free basis to BMJ Publishing Group Ltd ("BMJ") its licensees and where the relevant Journal is co-owned by BMJ to the co-owners of the Journal, to publish the Work in this journal and any other BMJ products and to exploit all rights, as set out in our [licence](#).

The Submitting Author accepts and understands that any supply made under these terms is made by BMJ to the Submitting Author unless you are acting as an employee on behalf of your employer or a postgraduate student of an affiliated institution which is paying any applicable article publishing charge ("APC") for Open Access articles. Where the Submitting Author wishes to make the Work available on an Open Access basis (and intends to pay the relevant APC), the terms of reuse of such Open Access shall be governed by a Creative Commons licence – details of these licences and which [Creative Commons](#) licence will apply to this Work are set out in our licence referred to above.

Other than as permitted in any relevant BMJ Author's Self Archiving Policies, I confirm this Work has not been accepted for publication elsewhere, is not being considered for publication elsewhere and does not duplicate material already published. I confirm all authors consent to publication of this Work and authorise the granting of this licence.

1  
2  
3  
4 Metformin use and long-term risk of benign prostatic hyperplasia. A population-based cohort study.  
5  
6  
7  
8  
9  
10  
11  
12

13 Mette Nørgaard PhD<sup>1</sup>, Bianka Darvalics MSc<sup>1</sup>, Reimar W Thomsen PhD<sup>1</sup>  
14  
15

16 <sup>1</sup>Department of Clinical Epidemiology, Institute of Clinical Medicine, Aarhus University Hospital,  
17  
18 Aarhus, Denmark  
19  
20  
21  
22  
23  
24

25 **Corresponding Author:**  
26  
27

28 Mette Nørgaard, Department of Clinical Epidemiology, Aarhus University Hospital, Olof Palmes  
29  
30 Allé 43-45, 8200 Aarhus N, Denmark. Telephone: +45 87168205; Fax: +45 87167215; E-mail:  
31  
32 mn@clin.au.dk  
33  
34  
35  
36  
37  
38

39 Word count: Text: 3527  
40  
41

42 Abstract: 283  
43  
44

45 Number of figures/tables: 3 tables (embedded in the text) and 1 figure  
46  
47

48 **Keywords:** benign prostatic hyperplasia, metformin, population-based cohort study, sulfonylurea,  
49  
50 type 2 diabetes  
51  
52  
53  
54  
55  
56  
57  
58  
59  
60

## Abstract

**Objective:** To assess whether metformin use affects risk of benign prostatic hyperplasia (BPH) by comparing the risk of BPH in men with type 2 diabetes who initiated first-line treatment with either metformin or sulfonylurea monotherapy between 2000 or 2006 in Northern Denmark. In this period, sulfonylurea or metformin were both frequently used as first line glucose-lowering drug treatment.

**Design:** A population-based cohort study

**Setting:** Northern Denmark

**Participants:** All men who filled at least 2 prescriptions for metformin or for sulfonylurea, respectively during their first 6 months of glucose-lowering drug treatment. Follow-up started 6 months after treatment start.

**Primary outcome measures:** Rates of subsequent BPH, identified based on community prescriptions for BPH-related treatment or hospital BPH diagnoses, and rates of transurethral resection of the prostate (TURP). Rates in metformin and sulfonylurea users were compared overall and stratified by 6-month hemoglobin A<sub>1c</sub> (HbA<sub>1c</sub>) using Cox regression and an intention to treat (ITT) approach and an as treated analysis.

**Results** During follow-up less than 5 persons were lost to follow-up due to emigration. In 3,953 metformin initiators with a median follow-up of 10 years, the 10-year cumulative incidence was 25.7 % (95% CI 24.2 to 27.1). Compared with 5,958 sulfonylurea users (median follow-up 8 years, 10-year cumulative incidence 27.4% (95% CI 26.2 to 28.6)), the crude hazard ratio (HR) for BPH was 0.83 (95% CI 0.77 to 0.89) and adjusted HR in the ITT analyses was 0.97 (95% CI 0.88 to 1.06). For TURP the adjusted HR was 0.96 (95% CI 0.63 to 1.46). In the as-treated analysis, adjusted HR for BPH was 0.91 (95% CI 0.81 to 1.02).

1  
2  
3  
4 **Conclusions** Compared with sulfonylurea, metformin did not substantially reduce the incidence of  
5  
6 BPH in men with diabetes.  
7  
8  
9  
10  
11  
12  
13  
14  
15  
16  
17  
18  
19  
20  
21  
22  
23  
24  
25  
26  
27  
28  
29  
30  
31  
32  
33  
34  
35  
36  
37  
38  
39  
40  
41  
42  
43  
44  
45  
46  
47  
48  
49  
50  
51  
52  
53  
54  
55  
56  
57  
58  
59  
60

For peer review only

1  
2  
3  
4  
5  
6  
7  
8  
9  
10  
11  
12  
13  
14  
15  
16  
17  
18  
19  
20  
21  
22  
23  
24  
25  
26  
27  
28  
29  
30  
31  
32  
33  
34  
35  
36  
37  
38  
39  
40  
41  
42  
43  
44  
45  
46  
47  
48  
49  
50  
51  
52  
53  
54  
55  
56  
57  
58  
59  
60

### Strengths and limitations of this study

- The study used population-based data from two well-defined Danish regions.
- Use of nationwide medical registries allowed long and virtually complete follow-up
- Initiators of glucose-lowering drugs could be identified in a calendar period in which both metformin and sulfonylurea were recommended and used as first-line treatment which minimized confounding by indication.
- Benign prostatic hyperplasia was defined both based on hospital-related diagnoses and by prescriptions for relevant medication.
- We categorized treatment based on the choice of glucose-lowering drug during the first 6 months after treatment start applying an intention to treat principle but we also included an as treated analysis.

## Introduction

Benign prostatic hyperplasia (BPH) associated with lower urinary tract symptoms is a common condition estimated to affect around 20% of American men aged 30-79 years<sup>1</sup>. Risk factors associated with dysmetabolism and low-grade inflammation, including obesity, high blood glucose, low exercise, and poor diet, seem to contribute substantially to the development of BPH and lower urinary tract symptoms<sup>2,3</sup>. Moreover, prostatic inflammation is likely a key factor in the development of BPH and also prostate cancer<sup>4</sup>. Accordingly, it has been hypothesized that insulin resistance and increased fasting plasma insulin are promoters of both BPH and prostate cancer<sup>5</sup>.

Metformin is suggested to have various beneficial therapeutic effects.<sup>6</sup> Among men with type 2 diabetes, some observational studies have suggested that use of metformin reduces the risk of prostate cancer, compared with use of other glucose lowering drugs (GLD)<sup>7-9</sup> while others found no clear association<sup>10-12</sup>. A recent study found that metformin inhibits the proliferation of human prostate epithelial cells<sup>13</sup>, and thus may reduce the BPH development as well as development of prostate cancer. Yet, few studies have examined the association between use of metformin and risk of BPH in diabetic men. A cohort study including 192,457 male veterans with type 2 diabetes and 259,995 person-years of follow up found no association between use of thiazolidinediones or metformin and new medical or surgical treatment for BPH, when compared with use of sulfonylurea<sup>14</sup>. While, a recent cohort study from South Korea found among 211,648 men with newly diagnosed BPH that men with type 2 diabetes in metformin treatment had lower risk of progression to prostatectomy than both men without type 2 diabetes and men with type 2 diabetes with no metformin treatment<sup>15</sup>.

Comparing the effects of different GLDs in observational studies is complicated by the fact that the underlying indications/contraindications may differ between the drugs<sup>16</sup>. Compared with

1  
2  
3  
4 sulfonyleurea, metformin has a more favorable effect on body weight and insulin resistance and  
5  
6 patients receiving metformin are therefore likely to have a higher prevalence of obesity and a higher  
7  
8 plasma insulin level than users of sulfonyleurea<sup>17</sup>. At least since 2011, metformin has been  
9  
10 unequivocally consensus recommended as first-choice treatment in type 2 diabetes in Denmark,  
11  
12 based on evidence from the UK Prospective Diabetes Study 1998<sup>18</sup> and its 10-year follow up in  
13  
14 2008<sup>19</sup>. Already in the mid-2000s however, the European Association for the Study of Diabetes and  
15  
16 the American Diabetes Association recommended use of metformin as first-line drug<sup>20 21</sup>.  
17  
18 Previously - in particular during the first half of the 2000s - metformin and sulfonyleurea were both  
19  
20 widely recommended and used as first-line treatment for type 2 diabetes in Denmark<sup>22</sup>. We  
21  
22 therefore conducted a large population-based cohort study to examine the long-term risk of BPH in  
23  
24 men with type 2 diabetes who initiated pharmacotherapy with either metformin or sulfonyleurea  
25  
26 between 2000 and 2006 in Northern Denmark. Our hypothesis was that use of metformin was  
27  
28 associated with a lower BPH rate than use of sulfonyleurea in men with type 2 diabetes.  
29  
30  
31  
32  
33  
34  
35

## 36 **Methods**

### 37 *Setting*

38  
39 We conducted a population-based cohort study among men with type 2 diabetes living in Northern  
40  
41 Denmark using Danish medical databases. Northern Denmark consists of two regions, the Central  
42  
43 Denmark region and the North Denmark region with approximately 700,000 male inhabitants. All  
44  
45 residents are provided free tax-supported access to health care. All Danish residents are, at birth or  
46  
47 upon immigration, assigned a unique personal identifier, the CPR number, by the Danish Civil  
48  
49 Registration system (CRS)<sup>23</sup>. This identifier allows unambiguous linkage of data at the individual  
50  
51 level. The CRS additionally tracks changes in vital status, residence, and migration for the entire  
52  
53 Danish population on a daily basis. The Danish National Patient Registry (DNPR) has recorded all  
54  
55  
56  
57  
58  
59  
60



1  
2  
3  
4 admissions to all Danish hospitals since 1977<sup>24</sup>. Hospital outpatient and emergency room visits  
5  
6 have been included in the DNPR since 1995. Diagnoses are classified according to the *International*  
7  
8 *Classification of Diseases, Eighth Revision* (ICD-8) until the end of 1993 and *Tenth Revision* (ICD-  
9  
10 10) thereafter.  
11  
12  
13  
14  
15

### 16 *Assembly of the cohort*

17  
18 We included all men 30 years or older with incident type 2 diabetes, who received their first GLD  
19  
20 treatment between 1 January 2000 and 31 December 2006, corresponding to the time period when  
21  
22 the Danish guidelines recommended both metformin and sulfonylurea as first line treatment for type  
23  
24 2 diabetes<sup>22</sup>. We defined incident type 2 diabetes as either a first record in the Danish National  
25  
26 Patient Registry (DNPR) of a diabetes-associated inpatient admission (data available from 1977) or  
27  
28 outpatient clinic contact (data available from 1995) or the first record of a GLD prescription in the  
29  
30 Aarhus University Prescription Database (data available from 1996)<sup>25</sup>. Thus, patients with a GLD  
31  
32 prescription in the 1996-1999 period were excluded.  
33  
34  
35  
36  
37

### 38 *GLD treatment*

39  
40 We categorized patients according to their first GLD treatment, metformin or sulfonylurea. To  
41  
42 avoid including patients who switched or augmented GLD treatment very early (potentially due to  
43  
44 adverse reactions or insufficient early glucose control) we required the patients to receive either  
45  
46 metformin or sulfonylurea monotherapy for at least six months by requiring two prescriptions for  
47  
48 the same type of GLD within 6 months after treatment start. Accordingly, we did not include  
49  
50 patients who started combination therapy or who switched type of treatment away from metformin  
51  
52 or sulfonylurea monotherapy, respectively during the first 6 months of treatment. First, we used an  
53  
54 intention to treat principle and ignored treatment after the first 6 months when categorizing the  
55  
56  
57  
58  
59  
60

1  
2  
3  
4 patients according to treatment exposure. Next, we categorized patients “as treated” so that patients  
5  
6 were considered exposed with a specific GLD from first prescription of this GLD until the end of  
7  
8 the last prescription of this type of GLD (based on the estimated number of days covered by the  
9  
10 pack size of a filled prescription) + a washout period.  
11  
12

### 13 14 *Outcome*

15  
16  
17 Our primary outcome was first-time BPH defined as the first of a first-time hospital-related  
18  
19 discharge diagnosis (See supplementary data for codes) recorded in DNPR or a first time filled  
20  
21 community pharmacy prescription for BPH-treatment (alpha-blockers or 5-alpha reductase  
22  
23 inhibitors).  
24  
25

26  
27 As a secondary outcome, we included information on transurethral resection of the prostate  
28  
29 (TURP). Additionally, we examined hospital-related BPH diagnoses separately. Finally, we  
30  
31 identified all hospital contacts with a first time diagnosis code of urinary retention since this may be  
32  
33 a first acute manifestation of BPH but can also be caused by neuropathic bladder disease <sup>26</sup> and we  
34  
35 analyzed BPH and acute urinary retention as a composite outcome. We excluded men with any of  
36  
37 these outcomes before start of follow-up.  
38  
39  
40

### 41 42 *Diabetes severity*

43  
44  
45 We assessed diabetes severity at the time of follow-up start 6 months after first GLD treatment,  
46  
47 using diabetes duration (see below), the presence of microvascular and macrovascular diabetes  
48  
49 complications (see supplementary data for codes), and glycemic control, i.e. the latest hemoglobin  
50  
51 A1c (HbA<sub>1c</sub>) measured in the year prior to start of follow-up. HbA<sub>1c</sub> -levels were registered in the  
52  
53 clinical laboratory information system database (LABKA) which contains results of all analyses of  
54  
55 blood samples drawn from primary care and hospitalized patients and analyzed in hospital  
56  
57 laboratories in the Northern and Central Denmark regions <sup>27</sup>. We categorized HbA<sub>1c</sub> into three  
58  
59  
60

1  
2  
3  
4 levels (<7% [53 mmol/mol], 7-<8% [53-<64 mmol/mol], ≥8% [64 mmol/mol]) based on the  
5  
6 American Diabetes Association recommended goals for HbA<sub>1c</sub><sup>28</sup> and we categorized those with  
7  
8 missing variables separately.  
9

### 10 *Other covariates*

11  
12  
13 We obtained information on age from the Civil Registration System (CRS). From the DNPR we  
14  
15 included the 19 major comorbidities included in the Charlson comorbidity index (CCI), based on  
16  
17 each cohort member's entire hospital contact history prior to his index date and calculated the  
18  
19 patients CCI score (0, 1, 2+). We also included information on previous ischemic heart disease  
20  
21 (yes/no), cerebrovascular disease (yes/no), chronic obstructive pulmonary disease (COPD) (yes/no),  
22  
23 renal disease (yes/no) along with other covariates potentially associated with BPH or prostatic  
24  
25 inflammation: microvascular and macrovascular diabetes complications not included in the CCI;  
26  
27 diabetes duration (if a hospital diagnosis of diabetes was present before the GLD initiation/index  
28  
29 date); a hospital diagnosis of obesity (yes/no); alcoholism-related disorders (yes/no); use of  
30  
31 immunosuppressive drugs (yes/no), use of oral corticosteroids (yes/no), and use of statins (yes/no);  
32  
33 marital status as a marker of social support (married/never married/divorced/widowed); and  
34  
35 calendar period of GLD initiation (2000–2002/2003–2006).  
36  
37  
38  
39  
40

### 41 *Statistical analyses*

42  
43  
44 Follow-up started 6 months after date of first GLD treatment. We tabulated characteristics at the  
45  
46 start of follow-up for users of metformin and sulfonylurea, respectively.  
47  
48

49  
50 The men were followed until the outcome of interest, death, emigration, or end of study (7 October  
51  
52 2016), whichever came first. The outcome of interest could be a diagnosis of BPH, a diagnosis of  
53  
54 BPH and/ or a BPH-related prescription, and a diagnosis of BPH and/or a BPH-related prescription  
55  
56 and/or acute urinary retention, respectively or it could be a TURP.  
57  
58  
59  
60

1  
2  
3  
4 We computed incidence rates (IRs) for BPH (separately for the three BPH definitions and for  
5  
6 TURP, by dividing the number of incident outcome events by total exposed patient-time during  
7  
8 follow-up (expressed per 1,000 patient-years at risk). We used an intention to treat approach in our  
9  
10 main analysis in which we carried the GLD treatment used at follow-up start 6 month after GLD  
11  
12 initiation (metformin or sulfonylurea) forward. We constructed cumulative incidence curves to  
13  
14 illustrate time to BPH and/or BPH treatment while treating death as a competing risk.  
15  
16

17  
18 We also conducted an as treated analysis in which a patient was considered exposed to a certain  
19  
20 GLD as long as the prescription continued, based on the estimated number of days covered by the  
21  
22 pack size of a filled prescription + a 30 day wash-out period that accounted for overlapping  
23  
24 prescriptions and irregular drug use. In sensitivity analyses we changed the washout period to 0 and  
25  
26 90 days, respectively. In this analysis, we censored the patient if another GLD was added.  
27  
28

29  
30 Additional censoring criteria were metformin or sulfonylurea treatment cessation and crossover to  
31  
32 the other study drug. As alpha blockers may be used for other indications than symptomatic BPH,  
33  
34 we also conducted a sensitivity analysis in which we defined BPH as either a recorded diagnosis of  
35  
36 BPH or a prescription for a 5-alpha reductase inhibitor.  
37  
38

39  
40 We computed hazard ratios (HRs) of each definition of BPH (with 95% CIs) and of TURP  
41  
42 associated with the exposure categories described above (both intention to treat and as treated),  
43  
44 using Cox regression with sulfonylurea initiation as reference with adjustment for age, marital  
45  
46 status, diabetes duration, comorbidity (CCI level,) presence of micro- or macro-vascular  
47  
48 complications, HbA<sub>1c</sub> level achieved at start of follow-up, obesity, alcohol-related disease, use of  
49  
50 glucocorticoids, use of statins, and calendar period of first GLD treatment and we also stratified by  
51  
52 HbA<sub>1c</sub> level achieved at start of follow-up. We used a complete case analysis to handle missing  
53  
54 data. As sensitivity analysis we additionally analyzed the data using the missing indicator method  
55  
56  
57  
58  
59  
60

### *Patient and public involvement*

Patients or the public were not involved in the design, or conduct, or reporting, or dissemination plans of our research.

### *Research ethics*

The study was approved by the Danish Data Protection Agency (Record number 2014-54-0922 KEA-2015-4). Since no patient contact was involved, no separate permission from the Danish Scientific Ethical Committee was required according to Danish Legislation.

## **Results**

In the Northern Denmark cohort, we identified 9,911 men without BPH who filled at least two prescriptions within 6 months after treatment start for either metformin or sulfonylurea in 2000-2006. Of these, 3,953 (40%) started metformin treatment and 5,987 (60%) started sulfonylurea (Table 1).

The median age was 57 years (interquartile range [IQR] 49-65) for metformin users and 63 years (IQR 54-72) for sulfonylurea users. In addition to being younger, metformin users had less micro-vascular (5.9% versus 9.0%) and macro-vascular complications (22.2% versus 28.1%). Median HbA<sub>1c</sub> levels achieved at start of follow-up were similar 6.9% (52 mmol/mol) versus 6.8% (51 mmol/mol). The prevalence of hospital-recorded obesity was highest in metformin users while the prevalence of other included comorbidities was higher in sulfonylurea users (Table 1). Metformin users had highest prevalence of statin use, 38.2% versus 27.7 % in sulfonylurea users but had slightly lower prevalence of hospital-diagnosed cardiovascular disease.

1  
2  
3  
4 In the intention to treat analyses within up to 17 years of follow-up (median 10 years) and less than  
5  
6 5 persons lost to follow-up due to emigration, 1,061 metformin users had a hospital-related BPH  
7  
8 diagnosis or a BPH-related prescription corresponding to an IR per 1,000 PY of 33.36 (95% CI  
9  
10 31.35 to 35.37) and the 10-year cumulative incidence was 25.7 % (95% CI 24.2 to 27.1) (Table 2  
11  
12 and Figure 1). The IR per 1,000 PY in users of sulfonylurea was 40.32 (95% CI 38.45 to 42.20) and  
13  
14 the 10-year cumulative incidence of hospital-related BPH was 27.4% (95% CI 26.2 to 28.6).  
15  
16 Compared with sulfonylurea users, the crude HR for BPH (diagnosis or a BPH-related prescription)  
17  
18 was 0.83 (95% CI 0.77 to 0.89) and after adjustment it was 0.97 (95% CI 0.88 to 1.06).  
19  
20  
21  
22

23  
24 The number of metformin users with a hospital-related diagnosis of BPH was 196, yielding an IR  
25  
26 per 1,000 PY of 5.30 (95% CI 4.56-6.04) and a 10-year cumulative incidence of 4.7% (95% CI 4.1  
27  
28 to 5.5). Compared with sulfonylurea users, the crude HR for hospital-related BPH was 0.62 (95%  
29  
30 CI 0.53 to 0.74) and after adjustment it was 0.87 (95% CI 0.70 to 1.08).  
31  
32

33  
34 When combining urinary retention and BPH (diagnosis and/or BPH-related prescriptions), the  
35  
36 adjusted HR was 0.97 (95% CI 0.88 to 1.07). For TURP the adjusted HR was 0.96 (95% CI 0.63 to  
37  
38 1.46) (Table 2).  
39  
40

41  
42 When we included GLD treatment as a time-varying exposure and assumed a 30-day washout  
43  
44 period, metformin users had a marginally lower BPH rate (adjusted HR = 0.91 [95% CI 0.81 to  
45  
46 1.02]). For hospital-related BPH the adjusted HR was 0.75 (95% CI 0.58 to 0.96) and for TURP the  
47  
48 adjusted HR was 0.83 (95% CI 0.50 to 1.35) (Table 2). Changing the washout period to 0 days and  
49  
50 90 days, respectively only marginally changed these estimates. Defining BPH as either a recorded  
51  
52 BPH diagnosis or a prescription for a 5-alpha reductase inhibitor without including alpha blockers  
53  
54 lowered the BPH rate per 1,000 PY to 8.24 (95% CI 7.31 to 9.17) for metformin and 12.42 (95% CI  
55  
56 11.46 to 13.39) for sulfonylurea in the intention to treat analyses and a corresponding adjusted HR  
57  
58  
59  
60

1  
2  
3  
4 of 0.92 (95% CI 0.78 to 1.10). In the as treated analysis the adjusted HR was 0.85 (95% CI 0.70 to  
5  
6  
7 1.04).

8  
9  
10 When we stratified by HbA<sub>1c</sub> level in the intention to treat analyses, we observed a slightly lower  
11  
12 risk of hospital-related BPH diagnoses or use of BPH-related prescriptions in users of metformin  
13  
14 with HbA<sub>1c</sub> below <7% (53 mmol/mol) compared with sulfonylurea user with HbA<sub>1c</sub> below <7%  
15  
16 (53 mmol/mol), adjusted HR 0.91 (95% 0.80 to 1.03), while there was no beneficial effect among  
17  
18 those with HbA<sub>1c</sub> ≥7% (53 mmol/mol) (Table 3). Similarly results were found in the as treated  
19  
20 analyses with a 30-day washout period with use of metformin being associated with a slightly lower  
21  
22 risk of a hospital related BPH diagnosis or use of BPH-related prescriptions compared with use of  
23  
24 sulfonylurea (HR =0.87 [95% CI 0.76 to 1.00]) in patients with a HbA<sub>1c</sub> <7% (53 mmol/mol)  
25  
26  
27 (Table 3).

28  
29  
30  
31 Using the missing indicator method instead of complete case analysis to account for missing HbA<sub>1c</sub>  
32  
33 values did not affect the estimates. In the ITT analysis, the adjusted HR of BPH (diagnosis or a  
34  
35 BPH-related prescription) was 0.97 (95% CI 0.90 to 1.06) in the missing indicator analysis and 0.97  
36  
37 (95% CI 0.88 to 1.06) in the complete case analysis.

## 38 39 40 41 42 43 44 **Discussion**

45  
46  
47 In this population based cohort study including more than 9,000 men with type 2 diabetes who  
48  
49 started either metformin or sulfonylurea treatment as monotherapy in 2000-2006, we could not  
50  
51 confirm our hypothesis that users of metformin had substantially lower BPH rate than users of  
52  
53 sulfonylurea.  
54  
55  
56  
57  
58  
59  
60

1  
2  
3  
4  
5  
6  
7  
8  
9  
10  
11  
12  
13  
14  
15  
16  
17  
18  
19  
20  
21  
22  
23  
24  
25  
26  
27  
28  
29  
30  
31  
32  
33  
34  
35  
36  
37  
38  
39  
40  
41  
42  
43  
44  
45  
46  
47  
48  
49  
50  
51  
52  
53  
54  
55  
56  
57  
58  
59  
60

### *Comparison with the existing literature*

The results from our study with much longer follow-up (median 10 years) largely supports the previous findings by Murff et al from the US national Veterans Health Administration database<sup>14</sup> of no overall association between type of GLD treatment and BPH over a mean follow-up of 1.4 years. Since we additionally took glycemic control into consideration, our findings add to the existing literature.

Due to the shared biologic mechanisms of BPH and cancer, our results also indirectly add to the uncertainty regarding a causal role of metformin in prostate cancer. A recent meta-analysis found no association between metformin use and prostate cancer risk (RR was 0.97, 95% CI 0.80, 1.16) but had significant heterogeneity between studies<sup>29</sup>. Similarly, another systematic review included a comprehensive bias evaluation and concluded that the studies least likely to be affected by bias did not support a causal effect of metformin on cancer risk<sup>30</sup>. A recent Taiwanese study found that treatment with metformin reduced the risk of prostate cancer in men with Type 2 diabetes and BPH (adjusted HR of 0.69 [95% CI 0.49, 0.96])<sup>9</sup> but found a similar effect of traditional Chinese medicine which also points to a non-causal explanation. Thus, this issue remains unsettled.

### *Strengths and weaknesses*

Use of nationwide medical registries allowed us to conduct a large population-based cohort study with long and virtually complete follow-up. Patients with type 2 diabetes can be identified with at least 90% completeness using Danish registries<sup>31</sup> and the positive predictive value is >95%, with general practitioners registration as the gold standard. To minimize confounding by indication we identified GLD initiators in a calendar period in which both metformin and sulfonylurea were recommended and used as first-line treatment. Still, our study has some weaknesses that should be considered. We identified men with BPH partly by diagnosis codes recorded in a hospital-based setting, and these codes may not be entirely accurate. However, the positive predictive values of



1  
2  
3  
4 other diagnosis codes in the group of urogenital diseases are between 75% and 100% in DNPR <sup>32</sup>.

5  
6 We additionally included patients who were identified as having BPH based on the redemption of a  
7  
8 prescription for BPH-related medication. Still, we may have missed men with untreated BPH and  
9  
10 no contact to the hospital system. Since we do not expect the proportion of untreated BPH patients  
11  
12 to vary by type of GLD treatment, we do not, however, expect this to bias our relative estimates.  
13  
14

15  
16 Since we only included men who remained on metformin or sulphonylurea monotherapy for the  
17  
18 first 6 months of follow-up, our results does not address men with more advanced diabetes. Yet, we  
19  
20 had a median follow-up of 10 years and were able to follow some men for up to 17 years so we did  
21  
22 not only include information on early stage diabetes and when we stratified by achieved HbA1c we  
23  
24 did not see any BPH protective effect of metformin in those with poor glycemc control.  
25  
26

27  
28 We included BPH medication as part of our outcome definition but even though alpha-blockers are  
29  
30 first line treatment for symptomatic BPH they are not used exclusively for this indication and we  
31  
32 may therefore have included men without BPH but with other indications for alpha blockers.  
33  
34

35  
36 However, although we may have overestimated the rate of BPH when including alpha-blockers in  
37  
38 our definition we found similar relative estimates and our conclusion was not altered.  
39  
40

#### 41 *Methodological challenges*

42  
43 Also, several methodological challenges exist when comparing the effect of different GLDs and  
44  
45 these may affect our study. We categorized GLD treatment based on the choice of treatment during  
46  
47 the first 6 months after treatment start applying an intention to treat principle. Since patients may  
48  
49 switch between different GLDs, this approach likely leads to misclassification of treatment status  
50  
51 witch may bias the results towards the Null. We did, however, find similar tendency in our results  
52  
53 when using an as treated approach. Although metformin and sulfonylurea both were recommended  
54  
55 as first line drugs in our study period and have similar expected A1c-reducing efficiency, physicians  
56  
57  
58  
59  
60

1  
2  
3  
4 may have been more likely to prescribe sulfonylurea in patients with more severe type 2 diabetes  
5  
6 (including complications such as early signs of renal disease, or indicators of less insulin  
7  
8 production), and metformin in obese patients where weight gain or hypoglycemia was to be  
9  
10 avoided. Metformin is in more recent year even used off-label for weight reduction.<sup>33</sup> Consistent  
11  
12 with these expectations, we did observe different patient characteristics with metformin users being  
13  
14 younger, more obese, and fewer having micro-or macro-vascular complications. We based our  
15  
16 information on obesity on registered ICD-codes and we know these are likely substantially  
17  
18 underreported.<sup>34 35</sup> Accordingly, even though we adjusted for these differences, residual  
19  
20 confounding could still be present and could potentially mask a beneficial effect of metformin. Still,  
21  
22 registered obesity was only weakly associated with BPH in our study.  
23  
24  
25  
26  
27

28 Unfortunately, measures of C-peptide was not available for this study period and we could not take  
29  
30 endogenous insulin secretion into account. We also lacked information about lifestyle factors and  
31  
32 in a previous Danish study smoking was more prevalent in users of sulfonylurea compared with  
33  
34 users of metformin<sup>17</sup>. Yet, an association between smoking and BPH is not clearly established<sup>36</sup>.  
35  
36 Furthermore, unmeasured confounding due to differences in factors related to unhealthy lifestyle  
37  
38 and less social support between users of metformin and sulfonylurea might have influenced our  
39  
40 findings as well.  
41  
42  
43  
44

45 In conclusion, metformin did not seem to substantially reduce the risk of BPH in men with diabetes  
46  
47 compared with sulfonylurea.  
48  
49  
50  
51  
52  
53  
54  
55  
56  
57  
58  
59  
60

1  
2  
3  
4 **Contributorship statement:** MN designed the study, supervised the analyses, interpreted the data,  
5  
6 and wrote the manuscript. BD contributed to the design of the study, cleaned the data, conducted  
7  
8 the statistical analyses, interpreted the data, and revised the manuscript critically. RWT contributed  
9  
10 to the planning and design of the study, acquired the data, supervised the analyses, interpreted the  
11  
12 data, and revised the manuscript critically. All authors read and approved the final manuscript.  
13  
14  
15

16 **Funding:** This research received no specific grant from any funding agency in the public,  
17  
18 commercial or not-for-profit sectors  
19  
20  
21

22 **Competing interests:** None declared.  
23  
24

25 **Patient consent for publication:** Not required for registry-based research  
26  
27

28 **Ethics approval:** Ethics approval is not needed for purely registry-based studies in Denmark.  
29

30 Patients were not involved in setting the research question, the outcome measures, or the design or  
31  
32 implementation of the study. There are no plans to involve patients in dissemination of the results.  
33  
34  
35

36 **Data Availability:** The Danish nationwide registries used for this study are kept at and data were  
37  
38 analyzed at a secured server at the Danish Health Data Authority. Data may be obtained from a  
39  
40 third party and are not publicly available. Data are available upon reasonable request  
41  
42  
43  
44  
45  
46  
47  
48  
49  
50  
51  
52  
53  
54  
55  
56  
57  
58  
59  
60

## References

1. Maserejian NN, Chen S, Chiu GR, et al. Incidence of lower urinary tract symptoms in a population-based study of men and women. *Urology* 2013;82(3):560-4. doi: 10.1016/j.urology.2013.05.009 [published Online First: 2013/07/24]
2. Marshall LM, Holton KF, Parsons JK, et al. Lifestyle and health factors associated with progressing and remitting trajectories of untreated lower urinary tract symptoms among elderly men. *Prostate cancer and prostatic diseases* 2014;17(3):265-72. doi: 10.1038/pcan.2014.22 [published Online First: 2014/07/09]
3. Parsons JK. Lifestyle factors, benign prostatic hyperplasia, and lower urinary tract symptoms. *Current opinion in urology* 2011;21(1):1-4. doi: 10.1097/MOU.0b013e32834100c9 [published Online First: 2010/11/04]
4. Gandaglia G, Zaffuto E, Fossati N, et al. The role of prostatic inflammation in the development and progression of benign and malignant diseases. *Current opinion in urology* 2017;27(2):99-106. doi: 10.1097/mou.0000000000000369 [published Online First: 2016/12/03]
5. Hammarsten J, Peeker R. Urological aspects of the metabolic syndrome. *Nature reviews Urology* 2011;8(9):483-94. doi: 10.1038/nrurol.2011.112 [published Online First: 2011/08/04]
6. El-Arabey AA, Abdalla M, Ali Eltayb W. Metformin: Ongoing Journey with Superdrug Revolution. *Advanced pharmaceutical bulletin* 2019;9(1):1-4. doi: 10.15171/apb.2019.001 [published Online First: 2019/04/24]
7. Haring A, Murtola TJ, Talala K, et al. Antidiabetic drug use and prostate cancer risk in the Finnish Randomized Study of Screening for Prostate Cancer. *Scandinavian journal of urology* 2017;51(1):5-12. doi: 10.1080/21681805.2016.1271353 [published Online First: 2017/01/14]
8. Preston MA, Riis AH, Ehrenstein V, et al. Metformin use and prostate cancer risk. *European urology* 2014;66(6):1012-20. doi: 10.1016/j.eururo.2014.04.027 [published Online First: 2014/05/27]
9. Kuo YJ, Sung FC, Hsieh PF, et al. Metformin reduces prostate cancer risk among men with benign prostatic hyperplasia: A nationwide population-based cohort study. *Cancer medicine* 2019 doi: 10.1002/cam4.2025 [published Online First: 2019/04/11]
10. Currie CJ, Poole CD, Gale EAM. The influence of glucose-lowering therapies on cancer risk in type 2 diabetes. *Diabetologia* 2009;52(9):1766-77. doi: 10.1007/s00125-009-1440-6 [published Online First: 07/02]
11. Farmer RE, Ford D, Mathur R, et al. Metformin use and risk of cancer in patients with type 2 diabetes: a cohort study of primary care records using inverse probability weighting of marginal structural models. *International journal of epidemiology* 2019;48(2):527-37. doi: 10.1093/ije/dyz005 [published Online First: 2019/02/13]
12. Tsilidis KK, Capothanassi D, Allen NE, et al. Metformin does not affect cancer risk: a cohort study in the U.K. Clinical Practice Research Datalink analyzed like an intention-to-treat trial. *Diabetes care* 2014;37(9):2522-32. doi: 10.2337/dc14-0584 [published Online First: 2014/06/06]
13. Wang Z, Xiao X, Ge R, et al. Metformin inhibits the proliferation of benign prostatic epithelial cells. *PloS one* 2017;12(3):e0173335. doi: 10.1371/journal.pone.0173335 [published Online First: 2017/03/03]
14. Murff HJ, Roumie CL, Greevy RA, et al. Thiazolidinedione and Metformin Use and the Risk of Benign Prostate Hyperplasia in Veterans with Diabetes Mellitus. *Journal of men's health* 2014;11(4):157-62. doi: 10.1089/jomh.2014.0051 [published Online First: 2015/03/24]
15. Hong Y, Lee S, Won S. The preventive effect of metformin on progression of benign prostate hyperplasia: A nationwide population-based cohort study in Korea. *PloS one* 2019;14(7):e0219394. doi: 10.1371/journal.pone.0219394 [published Online First: 2019/07/20]
16. Davies MJ, D'Alessio DA, Fradkin J, et al. Management of hyperglycaemia in type 2 diabetes, 2018. A consensus report by the American Diabetes Association (ADA) and the European Association for the Study of Diabetes (EASD). *Diabetologia* 2018;61(12):2461-98. doi: 10.1007/s00125-018-4729-5

17. Ulrichsen SP, Mor A, Svensson E, et al. Lifestyle factors associated with type 2 diabetes and use of different glucose-lowering drugs: cross-sectional study. *PloS one* 2014;9(11):e111849. doi: 10.1371/journal.pone.0111849 [published Online First: 2014/11/05]
18. Effect of intensive blood-glucose control with metformin on complications in overweight patients with type 2 diabetes (UKPDS 34). UK Prospective Diabetes Study (UKPDS) Group. *Lancet* 1998;352(9131):854-65. [published Online First: 1998/09/22]
19. Holman RR, Paul SK, Bethel MA, et al. 10-year follow-up of intensive glucose control in type 2 diabetes. *The New England journal of medicine* 2008;359(15):1577-89. doi: 10.1056/NEJMoa0806470 [published Online First: 2008/09/12]
20. Global Guideline for Type 2 Diabetes: recommendations for standard, comprehensive, and minimal care. *Diabetic medicine : a journal of the British Diabetic Association* 2006;23(6):579-93. doi: 10.1111/j.1464-5491.2006.01918.x [published Online First: 2006/06/09]
21. Nathan DM, Buse JB, Davidson MB, et al. Management of hyperglycemia in type 2 diabetes: A consensus algorithm for the initiation and adjustment of therapy: a consensus statement from the American Diabetes Association and the European Association for the Study of Diabetes. *Diabetes care* 2006;29(8):1963-72. doi: 10.2337/dc06-9912 [published Online First: 2006/07/29]
22. Medicinsk Kompendium. 16 ed: Nyt Nordisk Forlag Arnold Busck 2004.
23. Schmidt M, Pedersen L, Sorensen HT. The Danish Civil Registration System as a tool in epidemiology. *European journal of epidemiology* 2014;29(8):541-9. doi: 10.1007/s10654-014-9930-3 [published Online First: 2014/06/27]
24. Schmidt M, Schmidt SA, Sandegaard JL, et al. The Danish National Patient Registry: a review of content, data quality, and research potential. *Clin Epidemiol* 2015;7:449-90. doi: 10.2147/CLEP.S91125 [doi];clep-7-449 [pii]
25. Ehrenstein V, Antonsen S, Pedersen L. Existing data sources for clinical epidemiology: Aarhus University Prescription Database. *Clinical epidemiology* 2010;2:273-9. doi: 10.2147/clep.s13458 [published Online First: 2010/12/15]
26. Selius BA, Subedi R. Urinary retention in adults: diagnosis and initial management. *American family physician* 2008;77(5):643-50. [published Online First: 2008/03/21]
27. Grann AF, Erichsen R, Nielsen AG, et al. Existing data sources for clinical epidemiology: The clinical laboratory information system (LABKA) research database at Aarhus University, Denmark. *Clinical epidemiology* 2011;3:133-8. doi: 10.2147/clep.s17901 [published Online First: 2011/04/14]
28. 6. Glycemic Targets: Standards of Medical Care in Diabetes-2020. *Diabetes care* 2020;43(Suppl 1):S66-s76. doi: 10.2337/dc20-S006 [published Online First: 2019/12/22]
29. Feng Z, Zhou X, Liu N, et al. Metformin use and prostate cancer risk: A meta-analysis of cohort studies. *Medicine* 2019;98(12):e14955-e55. doi: 10.1097/MD.00000000000014955
30. Farmer RE, Ford D, Forbes HJ, et al. Metformin and cancer in type 2 diabetes: a systematic review and comprehensive bias evaluation. *International journal of epidemiology* 2017;46(2):728-44. doi: 10.1093/ije/dyw275
31. Carstensen B, Kristensen JK, Marcussen MM, et al. The National Diabetes Register. *Scandinavian journal of public health* 2011;39(7 Suppl):58-61. doi: 10.1177/1403494811404278 [published Online First: 2011/08/04]
32. Schmidt M, Schmidt SA, Sandegaard JL, et al. The Danish National Patient Registry: a review of content, data quality, and research potential. *Clinical epidemiology* 2015;7:449-90. doi: 10.2147/clep.s91125 [published Online First: 2015/11/26]
33. El-Arabey AA. Update on off label use of metformin for obesity. *Primary care diabetes* 2018;12(3):284-85. doi: 10.1016/j.pcd.2018.02.004 [published Online First: 2018/03/12]
34. Søggaard M, Heide-Jørgensen U, Nørgaard M, et al. Evidence for the low recording of weight status and lifestyle risk factors in the Danish National Registry of Patients, 1999-2012. *BMC public health* 2015;15:1320. doi: 10.1186/s12889-015-2670-9 [published Online First: 2015/12/31]

1  
2  
3  
4  
5  
6  
7  
8  
9  
10  
11  
12  
13  
14  
15  
16  
17  
18  
19  
20  
21  
22  
23  
24  
25  
26  
27  
28  
29  
30  
31  
32  
33  
34  
35  
36  
37  
38  
39  
40  
41  
42  
43  
44  
45  
46  
47  
48  
49  
50  
51  
52  
53  
54  
55  
56  
57  
58  
59  
60

35. Gribsholt SB, Pedersen L, Richelsen B, et al. Validity of ICD-10 diagnoses of overweight and obesity in Danish hospitals. *Clinical epidemiology* 2019;11:845-54. doi: 10.2147/clip.s214909 [published Online First: 2019/10/02]
36. Xu H, Fu S, Chen Y, et al. Smoking habits and benign prostatic hyperplasia: A systematic review and meta-analysis of observational studies. *Medicine (Baltimore)* 2016;95(32):e4565. doi: 10.1097/md.0000000000004565 [published Online First: 2016/08/12]

For peer review only

**Table 1.** Baseline characteristics of men initiating either metformin or sulfonylurea monotherapy

| Characteristics                  | Metformin    | Sulfonylurea |
|----------------------------------|--------------|--------------|
|                                  | N (%)        | N (%)        |
| Total                            | 3,953        | 5,958        |
| Median age (Interquartile range) | 57 (49–65)   | 63 (54–72)   |
| Age group                        |              |              |
| 30 to <50 years                  | 1,003 (25.4) | 822 (13.8)   |
| 50 to <70 years                  | 2,373 (60.0) | 3,267 (54.8) |
| ≥70 years                        | 577 (14.6)   | 1,869 (31.4) |
| Year of study inclusion          |              |              |
| 2000-2002                        | 1,104 (27.9) | 2,726 (45.8) |
| 2003-2006                        | 2,849 (72.1) | 3,232 (54.2) |
| Marital status                   |              |              |
| Married                          | 2,435 (61.6) | 3,890 (65.3) |
| Never married                    | 681 (17.2)   | 765 (12.8)   |
| Divorced                         | 536 (13.6)   | 657 (11.0)   |
| Widowed                          | 223 (5.6)    | 597 (10.0)   |
| Missing                          | 78 (2.0)     | 49 (0.8)     |
| Diabetes duration                |              |              |
| Newly diagnosed                  | 2,328 (58.9) | 3,759 (63.1) |
| <1 year                          | 1,047 (26.5) | 1,367 (22.9) |
| 1-5 years                        | 409 (10.3)   | 532 (8.9)    |
| >5 years                         | 169 (4.3)    | 300 (5.0)    |
| Diabetes complications           |              |              |
| Microvascular                    | 235 (5.9)    | 535 (9.0)    |
| Macrovascular                    | 878 (22.2)   | 1,677 (28.1) |
| Hemoglobin A1c level             |              |              |

|                                  |              |              |
|----------------------------------|--------------|--------------|
| < 7 % (53mmol/mol)               | 1,542 (39.0) | 2,243 (37.6) |
| 7-<8 % (53-<64 mmol/mol)         | 769 (19.5)   | 980 (16.4)   |
| ≥8 % (64 mmol/mol)               | 561 (14.2)   | 839 (14.1)   |
| Missing                          | 1,081 (27.3) | 1,896 (31.8) |
| Comorbidities                    |              |              |
| Myocardial infarction            | 304 (7.7)    | 624 (10.5)   |
| Congestive heart failure         | 175 (4.4)    | 435 (7.3)    |
| Peripheral vascular disease      | 132 (3.3)    | 342 (5.7)    |
| Cerebrovascular disease          | 299 (7.6)    | 546 (9.2)    |
| Chronic pulmonary disease        | 305 (7.7)    | 537 (9.0)    |
| Cancer                           | 138 (3.5)    | 365 (6.1)    |
| Obesity                          | 501 (12.7)   | 313 (5.3)    |
| Alcoholism-related disorders     | 184 (4.7)    | 328 (5.5)    |
| Charlson comorbidity Index score |              |              |
| 0                                | 1,910 (48.3) | 2,781 (46.7) |
| 1-2                              | 1,677 (42.4) | 2,270 (38.1) |
| >2                               | 366 (9.3)    | 907 (15.2)   |
| Statins ever use                 | 1,511 (38.2) | 1,652 (27.7) |
| Immunosuppressants               | 25 (0.6)     | 51 (0.9)     |
| Oral corticosteroids             | 228 (5.8)    | 495 (8.3)    |

- Treatment initiation was defined as at least 2 prescriptions for the same drug and no prescriptions for other glucose lowering drugs prescribed during the first 6 months of treatment.
- Characteristics were measured at date of treatment start except Hemoglobin A<sub>1c</sub> level which was measured at start of follow-up 6 months after treatment start.



Table 2. Occurrence of benign prostatic hyperplasia in men with diabetes according to treatment initiation with metformin or sulfonylurea

|                                                                               | Intention to treat analysis |                     | As treated analysis |                     |
|-------------------------------------------------------------------------------|-----------------------------|---------------------|---------------------|---------------------|
|                                                                               | Metformin                   | Sulfonylurea        | Metformin           | Sulfonylurea        |
| <b>BPH diagnosis or use of BPH-related drugs</b>                              |                             |                     |                     |                     |
| Number                                                                        | 1,061                       | 1,773               | 774                 | 1,299               |
| Rate per 1,000 PY (95% CI)                                                    | 33.36 (31.35-35.37)         | 40.32 (38.45-42.20) | 31.21 (29.01-33.41) | 39.98 (37.81-42.16) |
| Crude HR (95% CI)                                                             | 0.83 (0.77 to 0.89)         | (ref)               | 0.78 (0.71 to 0.85) | (ref)               |
| Adjusted HR (95% CI)                                                          | 0.97 (0.88 to 1.07)         | (ref)               | 0.91 (0.81 to 1.02) | (ref)               |
| <b>BPH diagnosis</b>                                                          |                             |                     |                     |                     |
| Number                                                                        | 196                         | 441                 | 139                 | 330                 |
| Rate per 1,000 PY (95% CI)                                                    | 5.30 (4.56-6.04)            | 8.49 (7.70-9.28)    | 4.88 (4.07-5.69)    | 8.77 (7.82-9.72)    |
| Crude HR (95% CI)                                                             | 0.62 (0.53 to 0.74)         | (ref)               | 0.56 (0.46 to 0.68) | (ref)               |
| Adjusted HR (95% CI)                                                          | 0.87 (0.70 to 1.08)         | (ref)               | 0.75 (0.58 to 0.96) | (ref)               |
| <b>BPH diagnosis or use of BPH related prescriptions or urinary retention</b> |                             |                     |                     |                     |
| Number                                                                        | 1,124                       | 1,885               | 826                 | 1,392               |
| Rate per 1,000 PY (95% CI)                                                    | 35.59 (33.51-37.67)         | 43.18 (41.23-45.13) | 33.53 (31.24-35.82) | 43.15 (40.88-45.42) |
| Crude HR (95% CI)                                                             | 0.83 (0.77 to 0.89)         | (ref)               | 0.78 (0.7 to 0.85)  | (ref)               |
| Adjusted HR* (95% CI)                                                         | 0.97 (0.88 to 1.07)         | (ref)               | 0.91 (0.81 to 1.01) | (ref)               |
| <b>Trans-urethral resection of the prostate</b>                               |                             |                     |                     |                     |
| Number                                                                        | 63                          | 125                 | 42                  | 94                  |
| Rate per 1,000 PY (95% CI)                                                    | 1.67 (1.25-2.08)            | 2.33 (1.92-2.73)    | 1.45 (1.01-1.88)    | 2.42 (1.93-2.90)    |
| Crude HR (95% CI)                                                             | 0.72 (0.53 to 0.98)         | (ref)               | 0.61 (0.42 to 0.87) | (ref)               |
| Adjusted HR (95% CI)                                                          | 0.96 (0.63 to 1.46)         | (ref)               | 0.83 (0.50 to 1.35) | (ref)               |

- 1  
2  
3  
4  
5  
6  
7  
8  
9  
10  
11  
12  
13  
14  
15  
16  
17  
18  
19  
20  
21  
22  
23  
24  
25  
26  
27  
28  
29  
30  
31  
32  
33  
34  
35  
36  
37  
38  
39  
40  
41  
42  
43  
44  
45  
46  
47  
48  
49  
50  
51  
52  
53  
54  
55  
56  
57  
58  
59  
60
- Numbers, rates per 1,000 person years (PY), and hazard ratios (HRs) of benign prostatic hyperplasia (BPH) within up to 17 years of follow-up in men with diabetes according to initial treatment with metformin or sulfonylurea (intention to treat) and analyzed in an as treated approach (i.e time-varying exposure including a 30-day wash-out period).
  - HRs were adjusted for age, Charlson comorbidity index score, calendar period of diagnosis, marital status, HbA1c-level, microvascular and macro-vascular complications, obesity, and alcohol related disease, use of corticosteroids, use of statins and diabetes duration.

For peer review only

**Table 3.** Association between metformin and sulfonylurea initiation and occurrence of benign prostatic hyperplasia stratified by hemoglobin A<sub>1c</sub> level.

|                           | HbA <sub>1c</sub>      |                        |                               |                        |                        |                        |
|---------------------------|------------------------|------------------------|-------------------------------|------------------------|------------------------|------------------------|
|                           | <7 % (53mmol/mol)      |                        | 7 to <8% (53 to <64 mmol/mol) |                        | ≥ 8 % (64 mmol/mol)    |                        |
|                           | Crude HR<br>(95% CI)   | Adj HR<br>(95% CI)     | Crude HR<br>(95% CI)          | Adj HR<br>(95% CI)     | Crude HR<br>(95% CI)   | Adj HR<br>(95% CI)     |
| <b>Intention to treat</b> |                        |                        |                               |                        |                        |                        |
| Metformin                 | 0.78<br>(0.69 to 0.88) | 0.91<br>(0.80 to 1.03) | 0.86<br>(0.72 to 1.02)        | 1.03<br>(0.85 to 1.25) | 0.92<br>(0.74 to 1.15) | 1.07<br>(0.71 to 1.63) |
| Sulfonylurea              | (ref)                  | (ref)                  | (ref)                         | (ref)                  | (ref)                  | (ref)                  |
| <b>As treated</b>         |                        |                        |                               |                        |                        |                        |
| Metformin                 | 0.75<br>(0.66 to 0.86) | 0.87<br>(0.76 to 1.00) | 0.78<br>(0.63 to 0.96)        | 0.95<br>(0.75 to 1.20) | 0.90<br>(0.68 to 1.20) | 0.99<br>(0.72 to 1.34) |
| Sulfonylurea              | (ref)                  | (ref)                  | (ref)                         | (ref)                  | (ref)                  | (ref)                  |

- Crude and adjusted (adj) hazard ratios (HRs) of benign prostatic hyperplasia (BPH) defined as either a hospital-related BPH diagnosis or a first BHP-related prescription in men with diabetes according to initial treatment (intention to treat) and an as treated approach (including a 30 days washout period) stratified by hemoglobin A<sub>1c</sub> level (HbA<sub>1c</sub>).
- HRs were adjusted for age, Charlson comorbidity index score, calendar period of diagnosis, marital status, microvascular complications, macrovascular complications, obesity, and alcohol related disease, use of corticosteroids, use of statins, and diabetes duration.

1  
2  
3  
4  
5  
6  
7  
8  
9  
10  
11  
12  
13  
14  
15  
16  
17  
18  
19  
20  
21  
22  
23  
24  
25  
26  
27  
28  
29  
30  
31  
32  
33  
34  
35  
36  
37  
38  
39  
40  
41  
42  
43  
44  
45  
46  
47  
48  
49  
50  
51  
52  
53  
54  
55  
56  
57  
58  
59  
60

## Figure legends

Figure 1 Cumulative incidence of a hospital-related diagnosis of benign prostatic hyperplasia (BPH) or a prescription for BPH-related treatment in men with type 2 diabetes according to metformin or sulfonylurea treatment. Death is regarded as a competing risk.

For peer review only

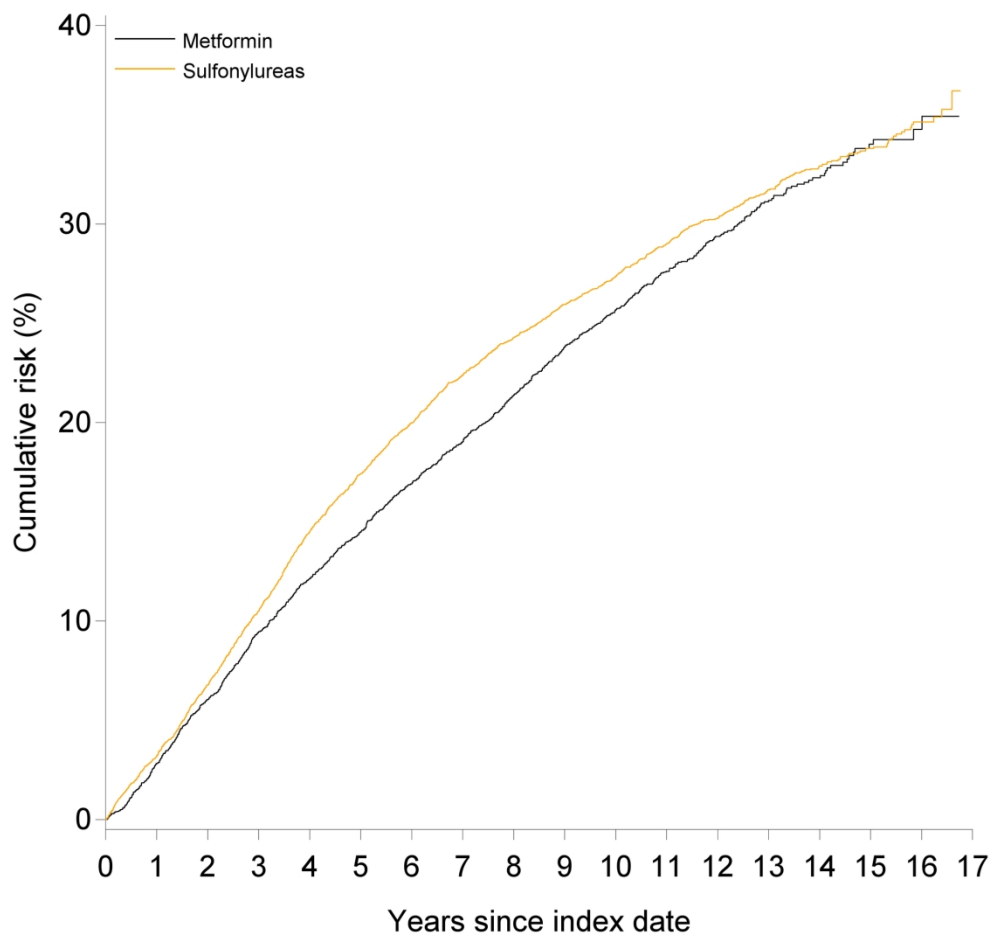

Figure 1 Cumulative incidence of a hospital-related diagnosis of benign prostatic hyperplasia (BPH) or a prescription for BPH-related treatment in men with type 2 diabetes according to metformin or sulfonylurea treatment. Death is regarded as a competing risk.

89x89mm (600 x 600 DPI)

1  
2  
3  
4 **Supplementary data**  
5

6  
7 Diagnosis, procedure and medication codes used in the study  
8  
9

10 **Hospital contact for type 2 diabetes**  
11

12  
13 ICD-8-codes: 249.x, 250.x.  
14

15  
16 ICD-10-codes: E10.x, E11.x, E14.x, G63.2.x, H36.0, N08.3  
17  
18

19  
20 **Glucose-lowering drugs ATC-codes:**  
21

22  
23 Metformin: A10BAxx; Sulfonylureas: A10BBxx; Insulin and analogues: A10Axxx;  
24  
25

26 Dipeptidyl peptidase 4 (DPP 4) inhibitors: A10BHxx; Glucagon-like peptide 1  
27  
28

29 (GLP-1) analogue: A10BX04, A10BX05, A10BX07, A10BX10; Maglitinides: A10BX02,  
30  
31

32 A10BX03, A10BX08; Other glucose-lowering drugs: A10BFxx (alpha glucosidase  
33  
34

35 inhibitor), A10BGxx (Thiazolidinedione); Combination tablets: A10BDxx  
36  
37

38 **BPH:**  
39

40  
41 ICD-8 codes: 600, ICD-10:N40  
42  
43

44  
45 **Transurethral resection of the prostate (TURP):**  
46

47  
48 Procedure code (Nomesco): KKED22  
49  
50

51 **BPH-related medical treatments:**  
52

53  
54 alpha-blockers: ATC-codes: C02CA, G04CA  
55  
56

57 5-alpha reductase inhibitors (ATC code: G04)  
58  
59  
60

**Microvascular complications:**

Nephropathy: ICD-8-codes: 25002, 24902

ICD-10-codes: E102, E112, E142, I120, N083, N06, N17, N18, N19, R809, BJFD2

Retinopathy ICD-8-codes: 25001, 24901

ICD-10-codes: E103, E113, E123, E133, E143, H340, H341, H342, H280, H334, H450, H360,

H540, H541, H544, H25, H268, H269, H430, H431, H438C, H439, H334A, H330, H335

Neuropathy ICD-8-codes: 25003, 24903

ICD-10-codes: E104, E114, E124, E134, E144, G590, G632, G603, G609, G618, G619, G620,

G621, G622, G628, G629, G630, G631, G634, G635, G636, G638, G730, G990,

**Macrovascular complications:**

ICD-8-codes: 410, 411, 412, 413, 414, 432, 433, 434, 435, 436, 437, 440

ICD-10-codes: I20, I21, I22, I23, I24, I25, I61, I63, I64, I65, I66, I672, I678, I679, I691, I693, I698,

I702, I742, I745, I739, I792, E105, E115, E125, E135, E145

**Alcoholism-related disorders:**

ICD-10-codes: K70, K852, K860, E244, F101, F102, F103, F104, F105, F106, F107,

F108, F109, G621, G721, G312, I426, K292, Z721, T500A, E529A, Z502, Z714

**Statin use:** ATC-code: B04AB

**Immunosuppressant use:** ATC-codes: L01, L04

**Oral corticosteroid use:** ATC-code: H02AB

## STROBE Statement—checklist of items that should be included in reports of observational studies

|                              | Item No | Recommendation                                                                                                                                                                                                                                                                                                                                                                                                                                                         | Page number |
|------------------------------|---------|------------------------------------------------------------------------------------------------------------------------------------------------------------------------------------------------------------------------------------------------------------------------------------------------------------------------------------------------------------------------------------------------------------------------------------------------------------------------|-------------|
| <b>Title and abstract</b>    | 1       | (a) Indicate the study's design with a commonly used term in the title or the abstract                                                                                                                                                                                                                                                                                                                                                                                 | 1           |
|                              |         | (b) Provide in the abstract an informative and balanced summary of what was done and what was found                                                                                                                                                                                                                                                                                                                                                                    | 2           |
| <b>Introduction</b>          |         |                                                                                                                                                                                                                                                                                                                                                                                                                                                                        |             |
| Background/rationale         | 2       | Explain the scientific background and rationale for the investigation being reported                                                                                                                                                                                                                                                                                                                                                                                   | 5-6         |
| Objectives                   | 3       | State specific objectives, including any prespecified hypotheses                                                                                                                                                                                                                                                                                                                                                                                                       | 6           |
| <b>Methods</b>               |         |                                                                                                                                                                                                                                                                                                                                                                                                                                                                        |             |
| Study design                 | 4       | Present key elements of study design early in the paper                                                                                                                                                                                                                                                                                                                                                                                                                | 6           |
| Setting                      | 5       | Describe the setting, locations, and relevant dates, including periods of recruitment, exposure, follow-up, and data collection                                                                                                                                                                                                                                                                                                                                        | 6-7         |
| Participants                 | 6       | (a) <i>Cohort study</i> —Give the eligibility criteria, and the sources and methods of selection of participants. Describe methods of follow-up<br><i>Case-control study</i> —Give the eligibility criteria, and the sources and methods of case ascertainment and control selection. Give the rationale for the choice of cases and controls<br><i>Cross-sectional study</i> —Give the eligibility criteria, and the sources and methods of selection of participants | 7+9         |
|                              |         | (b) <i>Cohort study</i> —For matched studies, give matching criteria and number of exposed and unexposed<br><i>Case-control study</i> —For matched studies, give matching criteria and the number of controls per case                                                                                                                                                                                                                                                 |             |
| Variables                    | 7       | Clearly define all outcomes, exposures, predictors, potential confounders, and effect modifiers. Give diagnostic criteria, if applicable                                                                                                                                                                                                                                                                                                                               | 8-9         |
| Data sources/<br>measurement | 8*      | For each variable of interest, give sources of data and details of methods of assessment (measurement). Describe comparability of assessment methods if there is more than one group                                                                                                                                                                                                                                                                                   | 7-9         |
| Bias                         | 9       | Describe any efforts to address potential sources of bias                                                                                                                                                                                                                                                                                                                                                                                                              | 10          |
| Study size                   | 10      | Explain how the study size was arrived at                                                                                                                                                                                                                                                                                                                                                                                                                              | 11          |
| Quantitative variables       | 11      | Explain how quantitative variables were handled in the analyses. If applicable, describe which groupings were chosen and why                                                                                                                                                                                                                                                                                                                                           | 9-10        |
| Statistical methods          | 12      | (a) Describe all statistical methods, including those used to control for confounding                                                                                                                                                                                                                                                                                                                                                                                  | 10          |
|                              |         | (b) Describe any methods used to examine subgroups and interactions                                                                                                                                                                                                                                                                                                                                                                                                    | N/A         |
|                              |         | (c) Explain how missing data were addressed                                                                                                                                                                                                                                                                                                                                                                                                                            | 9           |
|                              |         | (d) <i>Cohort study</i> —If applicable, explain how loss to follow-up was addressed<br><i>Case-control study</i> —If applicable, explain how matching of cases and controls was addressed<br><i>Cross-sectional study</i> —If applicable, describe analytical methods taking account of sampling strategy                                                                                                                                                              | N/A         |
|                              |         | (e) Describe any sensitivity analyses                                                                                                                                                                                                                                                                                                                                                                                                                                  | 10          |

Continued on next page



| <b>Results</b>           |     |                                                                                                                                                                                                                                                                                                 |                |
|--------------------------|-----|-------------------------------------------------------------------------------------------------------------------------------------------------------------------------------------------------------------------------------------------------------------------------------------------------|----------------|
| Participants             | 13* | (a) Report numbers of individuals at each stage of study—eg numbers potentially eligible, examined for eligibility, confirmed eligible, included in the study, completing follow-up, and analysed<br>(b) Give reasons for non-participation at each stage<br>(c) Consider use of a flow diagram | 11             |
| Descriptive data         | 14* | (a) Give characteristics of study participants (eg demographic, clinical, social) and information on exposures and potential confounders                                                                                                                                                        | Table 1        |
|                          |     | (b) Indicate number of participants with missing data for each variable of interest                                                                                                                                                                                                             | Table 1        |
|                          |     | (c) <i>Cohort study</i> —Summarise follow-up time (eg, average and total amount)                                                                                                                                                                                                                | 11             |
| Outcome data             | 15* | <i>Cohort study</i> —Report numbers of outcome events or summary measures over time                                                                                                                                                                                                             | Table 2        |
|                          |     | <i>Case-control study</i> —Report numbers in each exposure category, or summary measures of exposure                                                                                                                                                                                            |                |
|                          |     | <i>Cross-sectional study</i> —Report numbers of outcome events or summary measures                                                                                                                                                                                                              |                |
| Main results             | 16  | (a) Give unadjusted estimates and, if applicable, confounder-adjusted estimates and their precision (eg, 95% confidence interval). Make clear which confounders were adjusted for and why they were included                                                                                    | 11-12 + tables |
|                          |     | (b) Report category boundaries when continuous variables were categorized                                                                                                                                                                                                                       |                |
|                          |     | (c) If relevant, consider translating estimates of relative risk into absolute risk for a meaningful time period                                                                                                                                                                                | Figure 1       |
| Other analyses           | 17  | Report other analyses done—eg analyses of subgroups and interactions, and sensitivity analyses                                                                                                                                                                                                  |                |
| <b>Discussion</b>        |     |                                                                                                                                                                                                                                                                                                 |                |
| Key results              | 18  | Summarise key results with reference to study objectives                                                                                                                                                                                                                                        | 13             |
| Limitations              | 19  | Discuss limitations of the study, taking into account sources of potential bias or imprecision. Discuss both direction and magnitude of any potential bias                                                                                                                                      | 14-15          |
| Interpretation           | 20  | Give a cautious overall interpretation of results considering objectives, limitations, multiplicity of analyses, results from similar studies, and other relevant evidence                                                                                                                      | 14-15          |
| Generalisability         | 21  | Discuss the generalisability (external validity) of the study results                                                                                                                                                                                                                           |                |
| <b>Other information</b> |     |                                                                                                                                                                                                                                                                                                 |                |
| Funding                  | 22  | Give the source of funding and the role of the funders for the present study and, if applicable, for the original study on which the present article is based                                                                                                                                   | 15             |

\*Give information separately for cases and controls in case-control studies and, if applicable, for exposed and unexposed groups in cohort and cross-sectional studies.

**Note:** An Explanation and Elaboration article discusses each checklist item and gives methodological background and published examples of transparent reporting. The STROBE checklist is best used in conjunction with this article (freely available on the Web sites of PLoS Medicine at <http://www.plosmedicine.org/>, Annals of Internal Medicine at <http://www.annals.org/>, and Epidemiology at <http://www.epidem.com/>). Information on the STROBE Initiative is available at [www.strobe-statement.org](http://www.strobe-statement.org).
