# Supplementary material for: Metformin use and long-term risk of benign prostatic hyperplasia: a population-based cohort study
Source: PubMed Central journal article supplement — BMJ Open. 2020 Dec 22;10(12):e041875. doi: 10.1136/bmjopen-2020-041875 (PMC7757457; doi:10.1136/bmjopen-2020-041875), 2020-12-22
Supplement: bmjopen-2020-041875supp001.pdf [file bmjopen-2020-041875supp001.pdf]

**Supplementary data**

Diagnosis, procedure and medication codes used in the study

**Hospital contact for type 2 diabetes**

ICD-8-codes: 249.x, 250.x.

ICD-10-codes: E10.x, E11.x, E14.x, G63.2.x, H36.0, N08.3

**Glucose-lowering drugs ATC-codes:**

Metformin: A10BAxx; Sulfonylureas: A10BBxx; Insulin and analogues: A10Axxx;

Dipeptidyl peptidase 4 (DPP 4) inhibitors: A10BHxx; Glucagon-like peptide 1

(GLP-1) analogue: A10BX04, A10BX05, A10BX07, A10BX10; Maglitinides: A10BX02,

A10BX03, A10BX08; Other glucose-lowering drugs: A10BFxx (alpha glucosidase

inhibitor), A10BGxx (Thiazolidinedione); Combination tablets: A10BDxx

**BPH:**

ICD-8 codes: 600, ICD-10:N40

**Transurethral resection of the prostate (TURP):**

Procedure code (Nomesco): KKED22

**BPH-related medical treatments:**

alpha-blockers: ATC-codes: C02CA, G04CA

5-alpha reductase inhibitors (ATC code: G04)

**Microvascular complications:**

Nephropathy: ICD-8-codes: 25002, 24902

ICD-10-codes: E102, E112, E142, I120, N083, N06, N17, N18, N19, R809, BJFD2

Retinopathy ICD-8-codes: 25001, 24901

ICD-10-codes: E103, E113, E123, E133, E143, H340, H341, H342, H280, H334, H450, H360, H540, H541, H544, H25, H268, H269, H430, H431, H438C, H439, H334A, H330, H335

Neuropathy ICD-8-codes: 25003, 24903

ICD-10-codes: E104, E114, E124, E134, E144, G590, G632, G603, G609, G618, G619, G620, G621, G622, G628, G629, G630, G631, G634, G635, G636, G638, G730, G990,

**Macrovascular complications:**

ICD-8-codes: 410, 411, 412, 413, 414, 432, 433, 434, 435, 436, 437, 440

ICD-10-codes: I20, I21, I22, I23, I24, I25, I61, I63, I64, I65, I66, I672, I678, I679, I691, I693, I698, I702, I742, I745, I739, I792, E105, E115, E125, E135, E145

**Alcoholism-related disorders:**

ICD-10-codes: K70, K852, K860, E244, F101, F102, F103, F104, F105, F106, F107,

F108, F109, G621, G721, G312, I426, K292, Z721, T500A, E529A, Z502, Z714

**Statin use:** ATC-code: B04AB

**Immunosuppressant use:** ATC-codes: L01, L04

**Oral corticosteroid use:** ATC-code: H02AB
